# Supplementary material for: High energy state interactions, energetics and multiphoto-fragmentation processes of HI
Source: Royal Society of Chemistry journal article supplement (doi:10.1039/d1cp05714f), 2022-01-01
Supplement: d1cp05714f1.pdf [file d1cp05714f1.pdf]

# High energy state interactions, energetics and multiphoto-fragmentation processes of HI

Meng-Xu Jiang and Ágúst Kvaran\*

*Science Institute, University of Iceland, Dunhagi 3, 107 Reykjavík, Iceland.*

**Supplementary material:** Supporting material (figures and tables) to go with the main text of the paper ” High energy state interactions, energetics and multiphoto-fragmentation processes of HI”

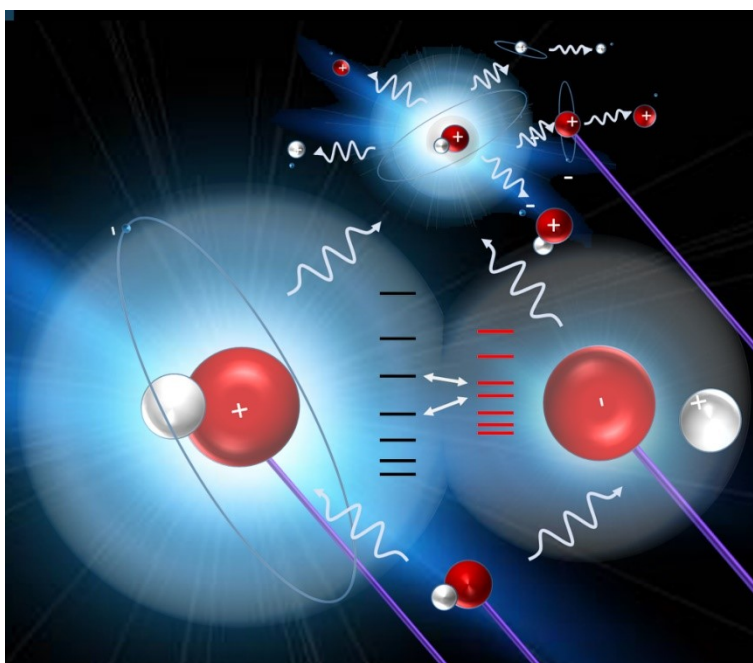

**Content:**

**pages:**

**Figures:**

**Fig. S1:** New REMPI Rydberg (Ry) state (HI\*\*) spectra analysed in the two-photon excitation region of 69 000 – 75 000 cm<sup>-1</sup>,

|                                                |   |
|------------------------------------------------|---|
| a) Ry: $d^3\Pi_1[3/2] 6p\sigma(v'=3)$ .....    | 6 |
| b) Ry: $f^3\Delta_2 [3/2]7p\pi (v'=0)$ .....   | 6 |
| c) Ry: $m^3\Pi_{2,1}[3/2]7s\sigma(v'=2)$ ..... | 7 |

-for ions as specified in the figures. Rotational line assignments for two-photon resonant transitions from the ground state  $X^1\Sigma^+(v''=0)$  are indicated.

**Fig. S2:** REMPI spectra of interacting excited states of HI for,

|                                                                             |    |
|-----------------------------------------------------------------------------|----|
| a) $P^1\Delta_2 [1/2]4f\pi(v'=0)$ and $k^3\Pi_2 [1/2]5d\delta(v'=1)$ ,..... | 8  |
| b) $j^3\Sigma_0^+[1/2]5d\pi(v'=1)$ and $V^1\Sigma^+(v'=m+22)$ , .....       | 9  |
| c) $M^1\Pi_1 [1/2]7s\sigma(v'=0)$ and $V^1\Sigma^+(v'=m+29)$ .....          | 9  |
| d) $r^3\Pi_0 [1/2]7p\sigma(v'=0)$ and $V^1\Sigma^+(v'=m+36)$ .....          | 10 |

Ion spectra as specified in the figures and assignments of rotational lines due to two-photon resonant transitions from the  $X^1\Sigma^+(v''=0)$  ground state.

**Fig. S3:** Simulation: Comparison of experimental and calculated two-photon absorption spectra for interacting states. Black and red arrows indicate the band origin for the two interacting states in each case. i) Two-photon REMPI spectra of HI for HI<sup>+</sup> (black) and H<sup>+</sup> (red) ions. ii) Calculated two-photon absorption spectrum<sup>1</sup>.

|                                                                                                    |    |
|----------------------------------------------------------------------------------------------------|----|
| a) Simulation of the $P^1\Delta_2 [1/2]4f\pi(v'=0)$ and $k^3\Pi_2 [1/2]5d\delta(v'=1)$ system..... | 11 |
| b) Simulation of the $j^3\Sigma_0^+[1/2]5d\pi(v'=1)$ and $V^1\Sigma^+(v'=m+22)$ system.....        | 11 |
| c) Simulation of the $M^1\Pi_1 [1/2]7s\sigma(v'=0)$ and $V^1\Sigma^+(v'=m+29)$ system.....         | 12 |
| d) Simulation of the $r^3\Pi_0 [1/2]7p\sigma(v'=0)$ and $V^1\Sigma^+(v'=m+36)$ system.....         | 12 |

**Fig. S4:** Perturbation effects due to the  $P^1\Delta_2 [1/2]4f\pi(v'=0)$  and  $k^3\Pi_2 [1/2]5d\delta(v'=1)$  state interaction:

|                                                                                                                                                              |    |
|--------------------------------------------------------------------------------------------------------------------------------------------------------------|----|
| a) Spacing between rotational levels ( $\Delta E_{J, J-1}$ ) as a function of $J'$ ; experimental values.....                                                | 13 |
| b) Reduced term value plots: Deperturbed energy level values subtracted from experimental energy level values. ....                                          | 13 |
| c) Relative ion-signal intensities ( $I(I^+)/I(HI^+)$ ) vs. $J'$ derived from the $Q$ -rotational lines for the $P^1\Delta_2 [1/2]4f\pi(v'=0)$ spectrum..... | 14 |
| d) Rotational line-widths vs $J'$ derived from the $Q$ lines of the I <sup>+</sup> signals for the $P^1\Delta_2 [1/2]4f\pi(v'=0)$ state spectrum.....        | 14 |

**Fig. S5:** Perturbation effects due to the  $j^3\Sigma_0^+[1/2]5d\pi(v'=1)$  and  $V^1\Sigma^+(v'=m+22)$  state interaction:

|                                                                                                                                                                                                               |    |
|---------------------------------------------------------------------------------------------------------------------------------------------------------------------------------------------------------------|----|
| a) Spacing between rotational levels ( $\Delta E_{J, J-1}$ ) as a function of $J'$ ; experimental values .....                                                                                                | 15 |
| b) Reduced term value plots: Deperturbed energy level values subtracted from experimental energy level values. ....                                                                                           | 15 |
| c) Relative ion-signal intensities ( $I(I^+)/I(HI^+)$ and $I(H^+)/I(HI^+)$ ) vs. $J'$ derived from the $Q$ -rotational lines for the $j^3\Sigma_0^+[1/2]5d\pi(v'=1)$ and $V^1\Sigma^+(v'=m+22)$ spectra... .. | 16 |
| d) Rotational line widths vs $J'$ derived from the $Q$ lines of ion-spectra for the $j^3\Sigma_0^+[1/2]5d\pi(v'=1)$ and $V^1\Sigma^+(v'=m+22)$ state spectra. ....                                            | 17 |

**Fig. S6** Perturbation effects due to the  $M^1\Pi_1 [1/2]7s\sigma(v'=0)$  and  $V^1\Sigma^+(v'=m+29)$  states interaction:

|                                                                                                                                                                           |    |
|---------------------------------------------------------------------------------------------------------------------------------------------------------------------------|----|
| a) Spacing between rotational levels ( $\Delta E_{J, J-1}$ ) as a function of $J'$ ; experimental values.....                                                             | 18 |
| b) Reduced term value plots: Deperturbed energy level values subtracted from experimental energy level values.....                                                        | 18 |
| c) Relative ion-signal intensities ( $I(I^+)/I(HI^+)$ and $I(H^+)/I(HI^+)$ ) vs. $J'$ derived from the $Q$ -rotational lines for the $V^1\Sigma^+(v'=m+29)$ spectrum..... | 19 |
| d) Rotational line widths vs. $J'$ derived from the $Q$ lines of the ion-spectra for the $V^1\Sigma^+(v'=m+29)$ state.....                                                | 19 |

**Fig. S7** Perturbation effects due to the  $r^3\Pi_0 [1/2]7p\sigma(v'=0)$  and  $V^1\Sigma^+(v'=m+36)$  state interaction:

|                                                                                                                                                                                                             |    |
|-------------------------------------------------------------------------------------------------------------------------------------------------------------------------------------------------------------|----|
| a) Spacing between rotational levels ( $\Delta E_{J, J-1}$ ) as a function of $J'$ ; experimental values.....                                                                                               | 20 |
| b) Reduced term value plots: Deperturbed energy level values subtracted from experimental energy level values.....                                                                                          | 20 |
| c) Relative ion-signal intensities ( $I(I^+)/I(HI^+)$ and $I(H^+)/I(HI^+)$ ) vs. $J'$ derived from the $Q$ -rotational lines for the $r^3\Pi_0 [1/2]7p\sigma(v'=0)$ and $V^1\Sigma^+(v'=m+36)$ spectra..... | 21 |
| d) Rotational line widths vs. $J'$ derived from the $Q$ lines of the ion-spectra for the $r^3\Pi_0 [1/2]7p\sigma(v'=0)$ and $V^1\Sigma^+(v'=m+36)$ states. ....                                             | 22 |

**Fig. S8:** Energy level diagram showing deperturbed (broken lines) and perturbed (solid lines) rotational energy levels for,

|                                                                            |    |
|----------------------------------------------------------------------------|----|
| a) $P^1\Delta_2 [1/2]4f\pi(v'=0)$ and $k^3\Pi_2 [1/2]5d\delta(v'=1)$ ..... | 23 |
| b) $j^3\Sigma_0^+[1/2]5d\pi(v'=1)$ and $V^1\Sigma^+(v'=m+22)$ .....        | 23 |
| c) $M^1\Pi_1 [1/2]7s\sigma(v'=0)$ and $V^1\Sigma^+(v'=m+29)$ .....         | 24 |
| d) $r^3\Pi_0 [1/2]7p\sigma(v'=0)$ and $V^1\Sigma^+(v'=m+36)$ .....         | 24 |

**Fig. S9:** Energy level diagram of known Rydberg states for HI converging to the ground ionic states  $X^2\Pi [3/2,1/2]$  as well as some predicted states.

|                                                                                               |    |
|-----------------------------------------------------------------------------------------------|----|
| a) $^{1,3}\Sigma$ and $^{1,3}\Delta$ , $[\Omega_c]n p\pi$ ( $n = 6, 7$ ) Rydberg states. .... | 25 |
| b) $^{1,3}\Sigma$ and $^{1,3}\Delta$ , $[\Omega_c]n d\pi$ ( $n = 5, 6$ ) Rydberg states. .... | 26 |
| c) $^{1,3}\Sigma$ and $^{1,3}\Delta$ , $[\Omega_c]n f\pi$ ( $n = 4, 5$ ) Rydberg states. .... | 27 |
| d) $^{1,3}\Pi$ Rydberg states with $\sigma$ and $\delta$ Rydberg electrons. ....              | 28 |

**Fig. S10** Vibrational energy levels the  $V^1\Sigma^+_{0+}(\sigma\pi^f)\sigma^*$  ion-pair state as well as vibrational energy level spacing ( $\Delta v^0(v'+1, v') = v^0(v'+1, v') - v^0(v')$ ) and rotational constants ( $B'(v')$ ) ..... 29

## Tables:

|                                                                                                                                                                                                                                                                                                                                                                                                       |       |
|-------------------------------------------------------------------------------------------------------------------------------------------------------------------------------------------------------------------------------------------------------------------------------------------------------------------------------------------------------------------------------------------------------|-------|
| <b>Tables S1:</b> .....                                                                                                                                                                                                                                                                                                                                                                               | 30-33 |
| <b>a – c):</b> Rotational lines; new Rydberg states , (a) $d^3\Pi_1[3/2] 6p\sigma(v'=3)$ ,<br>(b) $f^3\Delta_2 [3/2]7p\pi (v'=2)$ and (c) $m^3\Pi_{2,1}[3/2]7s\sigma(v'=2)$ .....                                                                                                                                                                                                                     | 30-31 |
| <b>d – g):</b> Rotational lines; Rydberg and ion-pair states which exhibit the localized level-to-level interactions, (d) $P^1\Delta_2 [1/2]4f\pi(v'=0)$ and $k^3\Pi_2 [1/2]5d\delta(v'=1)$ ,<br>e) $j^3\Sigma_0^+[1/2]5d\pi(v'=1)$ and $V^1\Sigma^+(v'=m+22)$ , (f) $M^1\Pi_1 [1/2]7s\sigma(v'=0)$ and<br>$V^1\Sigma^+(v'=m+29)$ (g) $r^3\Pi_0 [1/2]7p\sigma(v'=0)$ and $V^1\Sigma^+(v'=m+36)$ ..... | 31-33 |

## Tables S2:

|                                                                                                                                                                                                                                                                                                                                                                                       |    |
|---------------------------------------------------------------------------------------------------------------------------------------------------------------------------------------------------------------------------------------------------------------------------------------------------------------------------------------------------------------------------------------|----|
| a) <b>New HI Rydberg states:</b> Rydberg state specifications ( $Ry^{2S+1}A_{\Omega}[\Omega_c]nl\lambda$ ) (see main text), vibrational quantum numbers ( $v'$ ), symmetry, band origin ( $v^0$ ), rotational parameters ( $B', D'$ ), relative intensities, quantum defect values ( $\delta$ ) and line series derived from Rydberg state spectra.....                               | 33 |
| b) <b>Perturbed Rydberg and ion-pair states:</b> Rydberg and ion-pair states specifications ( $Ry^{2S+1}A_{\Omega}[\Omega_c]nl\lambda$ ) (see main text), vibrational quantum numbers ( $v'$ ), symmetry, band origin ( $v^0$ ), rotational parameters ( $B', D'$ ), relative intensities, quantum defect values ( $\delta$ ) and line series derived from Rydberg state spectra..... | 34 |

**Table S3:** State interactions;  $J'$  level proximity ( $\Delta E_{J'} = E_{J'}(1) - E_{J'}(2) / \text{cm}^{-1}$ ), interaction strength ( $W_{12} / \text{cm}^{-1}$ ) and fractional state mixing ( $c_1^2, c_2^2$ )..... 35

**Table S4.** Summary of Rydberg states and spectra, previously observed and reassigned..... 36-38

**Table S5.** Summary of ion-pair states and spectra previously observed..... 39-40

**References**..... 40

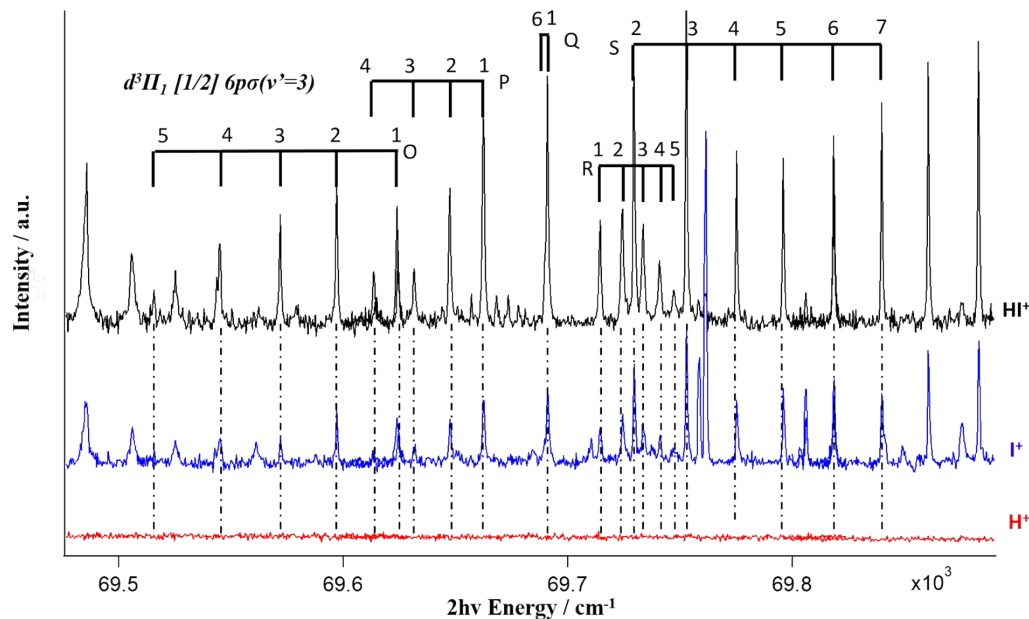

**Fig. S1 a)** REMPI spectra for HI for 2hv resonant transition in the excitation region of 69480 – 69900  $\text{cm}^{-1}$ . Top (black) is the  $\text{HI}^+$  ion, middle (blue) is  $\text{I}^+$  ion, bottom (red) is  $\text{H}^+$  ion. The new  $d^3\Pi_1 [3/2] 6p\sigma(v'=3)$  Rydberg states was located and assigned in the  $\text{HI}^+$  and  $\text{I}^+$  spectra.

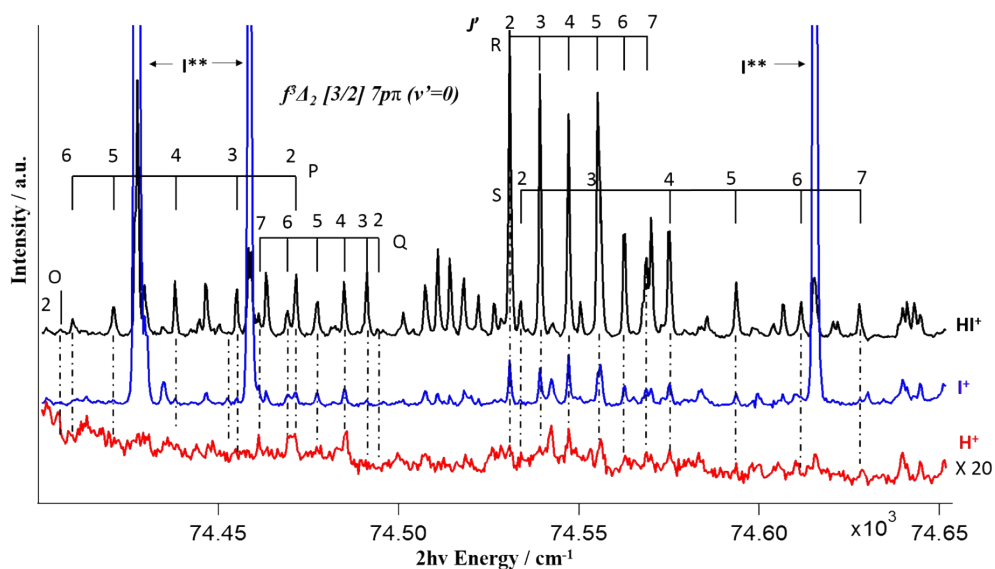

**Fig. S1 b)** REMPI spectra for HI due to 2hv resonance transition in the energy region of 74 440 – 74 620  $\text{cm}^{-1}$ . Ions are indicated. Assignment of rotational line of the  $F^1\Delta_2 [1/2] 6p\pi (v'=2)$  Rydberg state spectrum in the  $\text{HI}^+$  ion spectrum is shown.

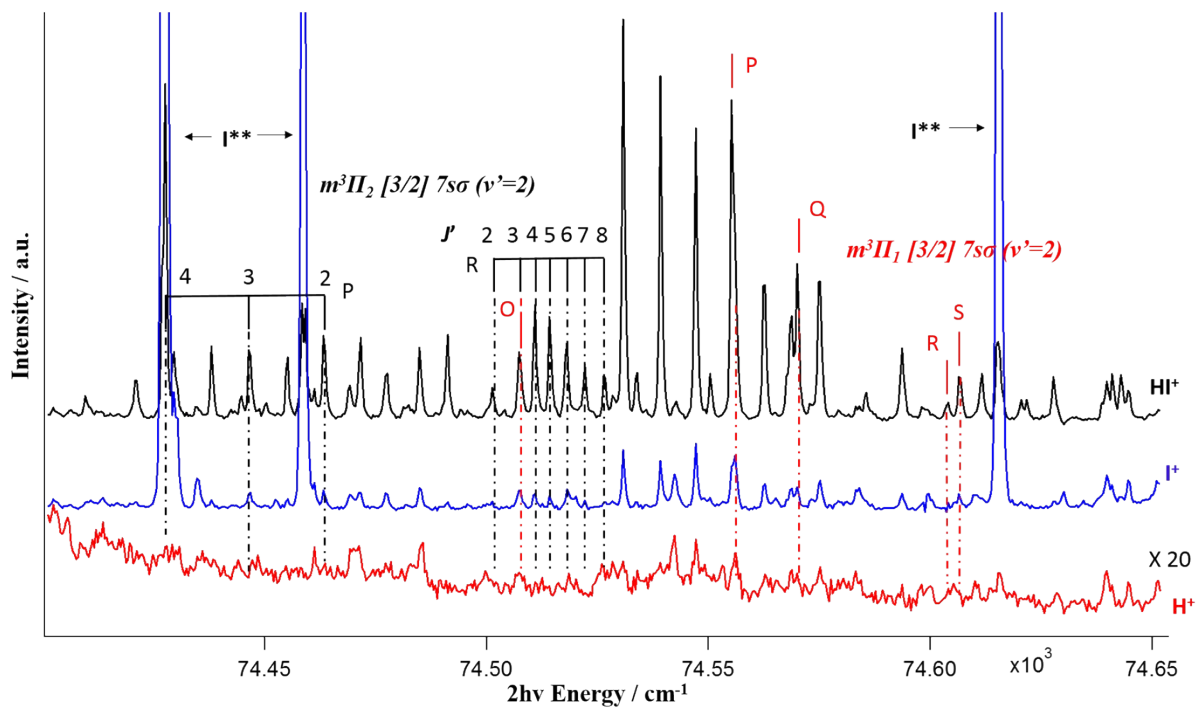

**Fig. S1 c)** REMPI spectra of HI due to  $2h\nu$  resonance transition in the excitation region of  $74\,440 - 74\,620\text{ cm}^{-1}$ . Assignment of rotational line of the  $m^3\Pi_{2,1}[1/2]7s\sigma (v'=2)$  Rydberg state spectrum in the  $\text{HI}^+$  ion spectrum is indicated.

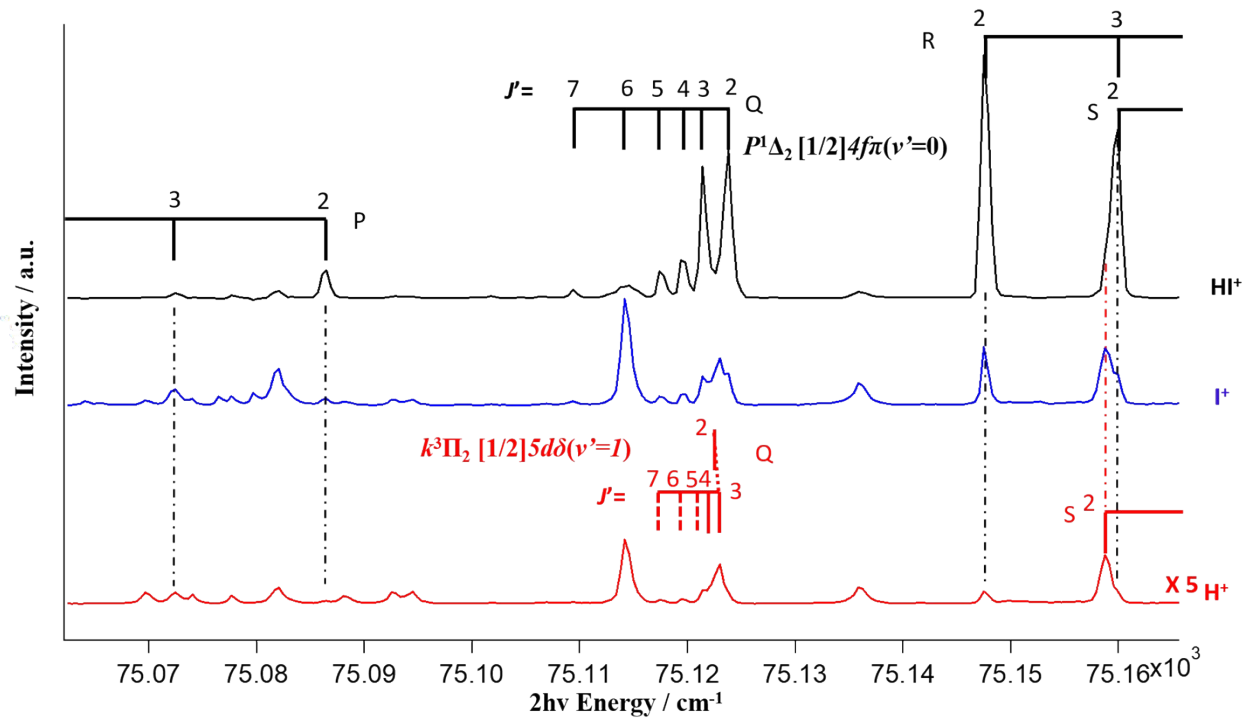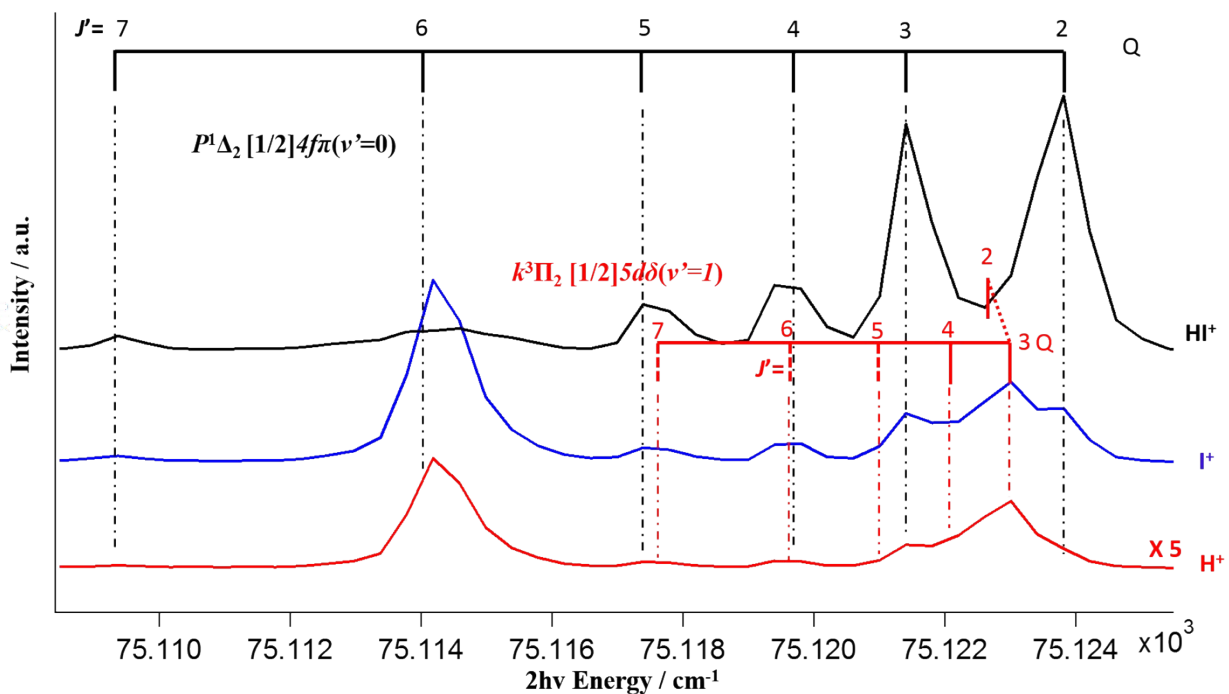

**Fig S2 a)** REMPI spectra for HI due to 2hv resonance transition in the excitation region of 75000 – 75200 cm<sup>-1</sup>. Top (black): HI<sup>+</sup> ion, middle (blue): I<sup>+</sup> ion, bottom (red): H<sup>+</sup> ion. The new  $k^3\Pi_2 [1/2]5d\delta(v'=1)$  Rydberg state spectrum was located and assigned.



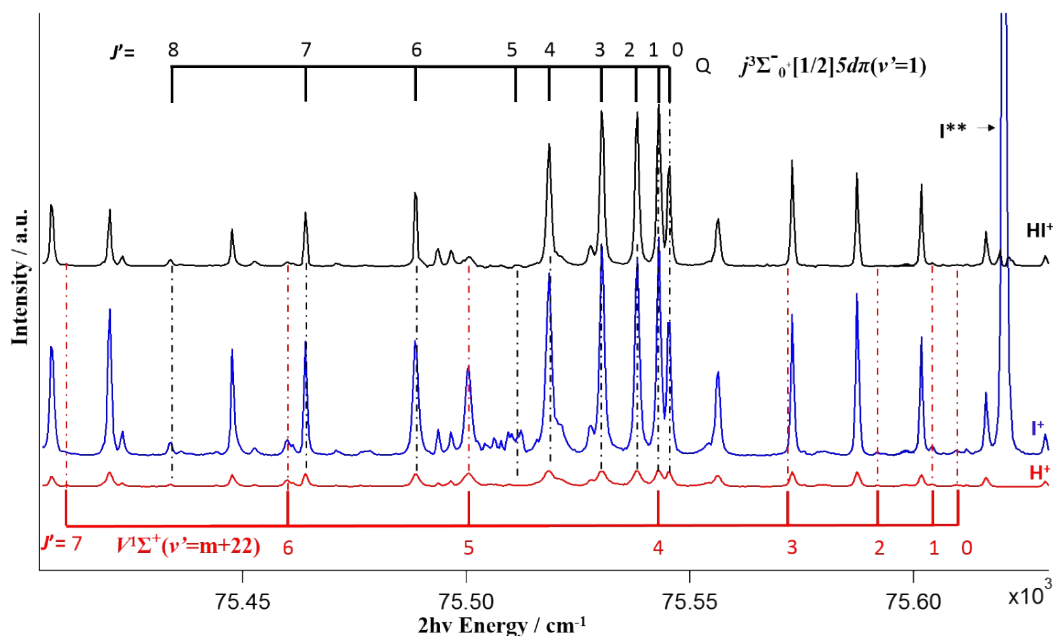

**Fig. S2 b)** REMPI spectra for HI due to 2hv resonance transition in the excitation region of 75300 – 75700  $\text{cm}^{-1}$ . Assignment of rotational  $Q$ -lines,  $J' = 0 - 7$  for the  $V^1\Sigma^+(v' = m + 22)$  ion-pair vibrational state in the  $\text{I}^+$  and  $\text{H}^+$  ion spectrum is shown.

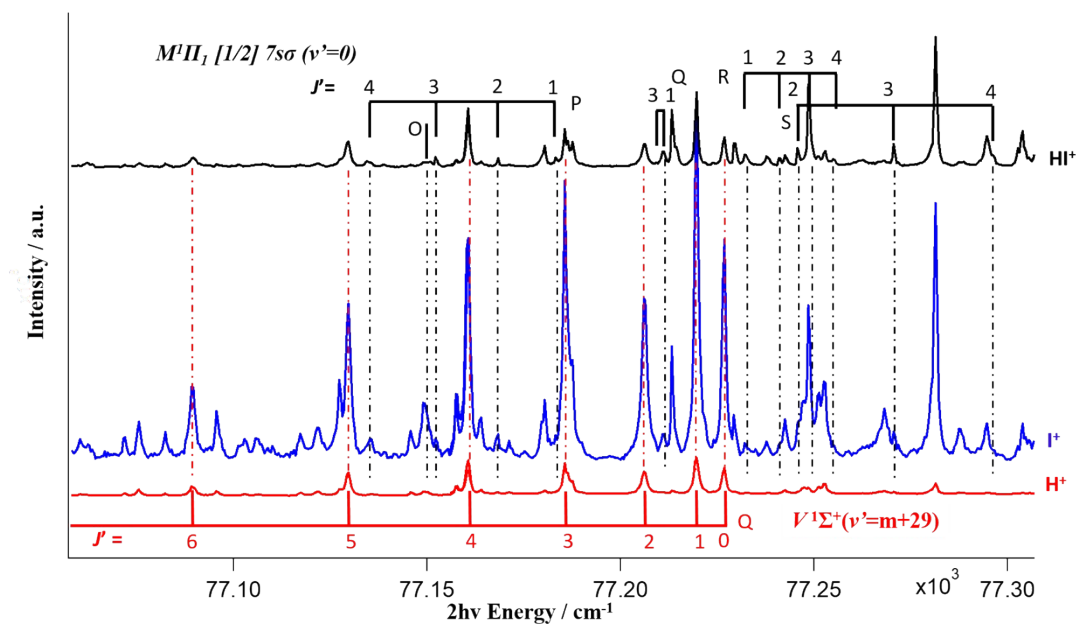

**Fig. S2 c)** REMPI spectra for HI due to 2hv resonance transition in the excitation region of 77000 – 77300  $\text{cm}^{-1}$ . Ions are indicated. The new  $M^1\Pi_1 [1/2]7s\sigma(v'=0)$  Rydberg state spectrum was located and assigned.

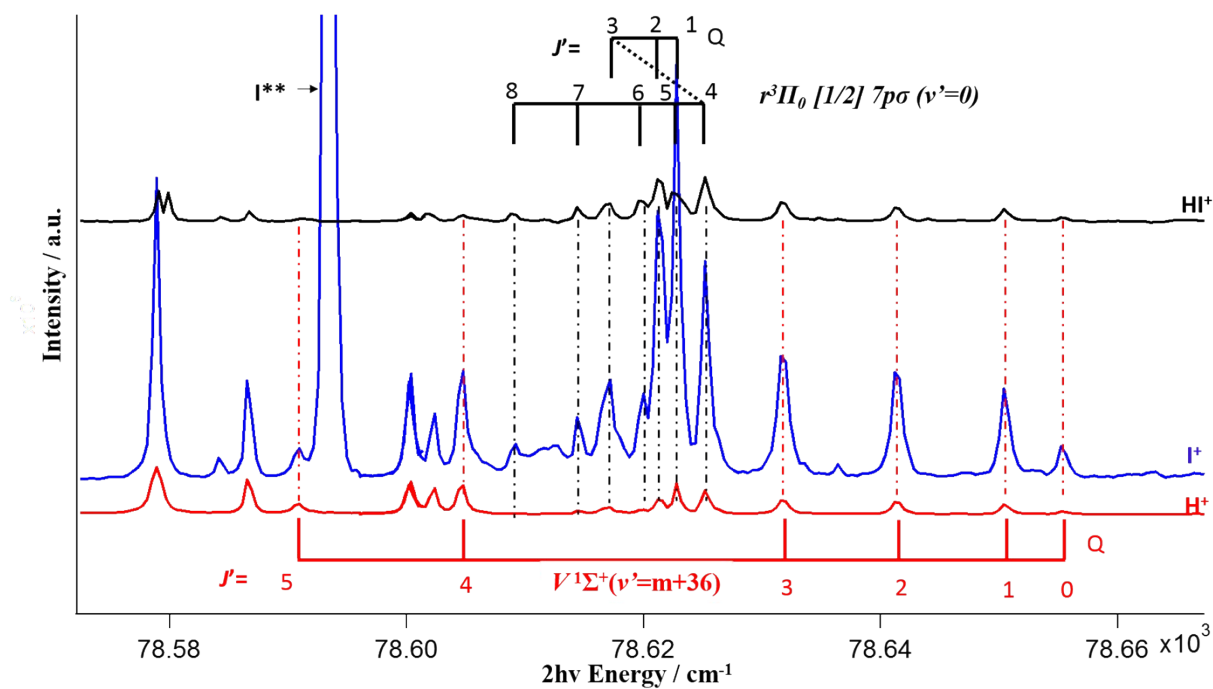

**Fig. S2 d)** REMPI spectra for HI due to 2hv resonance transition in the excitation region of 78500 – 78700 cm<sup>-1</sup>. Top (black): HI<sup>+</sup> ion, middle (blue): I<sup>+</sup> ion, bottom (red): H<sup>+</sup> ion. The new  $R^1\Pi_1 [1/2] 7p\sigma (v'=0)$  Rydberg state spectrum and  $V^1\Sigma^+(v'=m+36)$  ion-paired state spectrum were located and assigned.

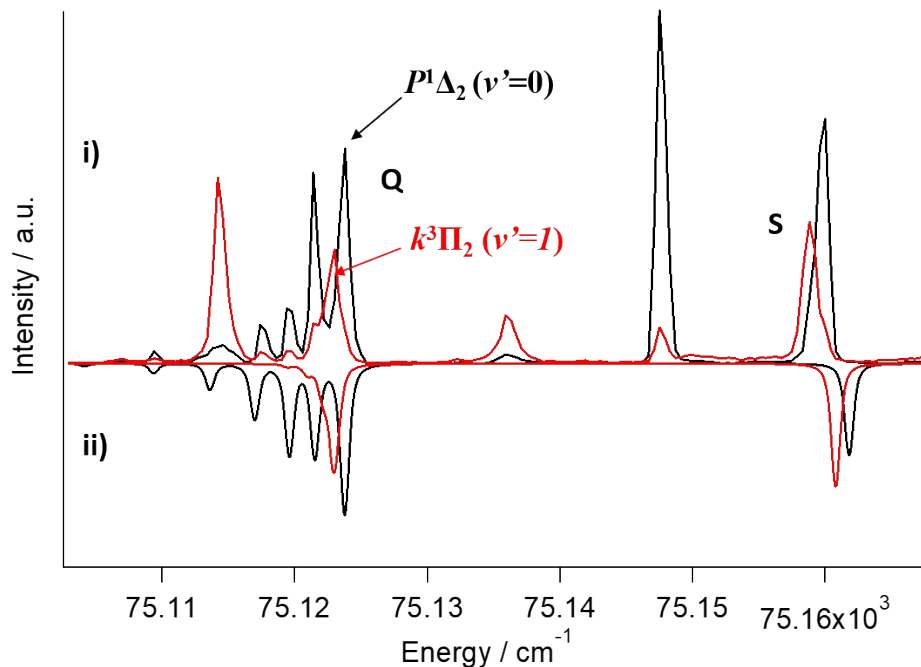

**Fig. S3 a)** Simulation of  $P^1\Delta_2 [1/2]4f\pi(v'=0)$  and  $k^3\Pi_2 [1/2]5d\delta(v'=1)$  system, i) Experimental data; ii) calculated.

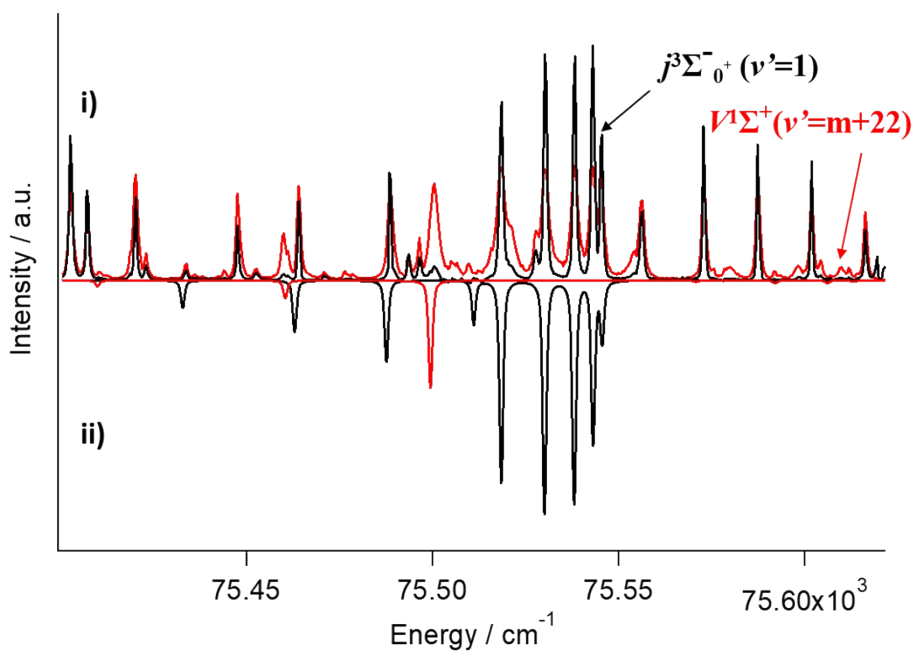

**Fig. S3 b)** Simulation of  $j^3\Sigma_0^- [1/2]5d\pi(v'=1)$  and  $V^1\Sigma^+(v'=m+22)$  system, i) Experimental data; ii) calculated.

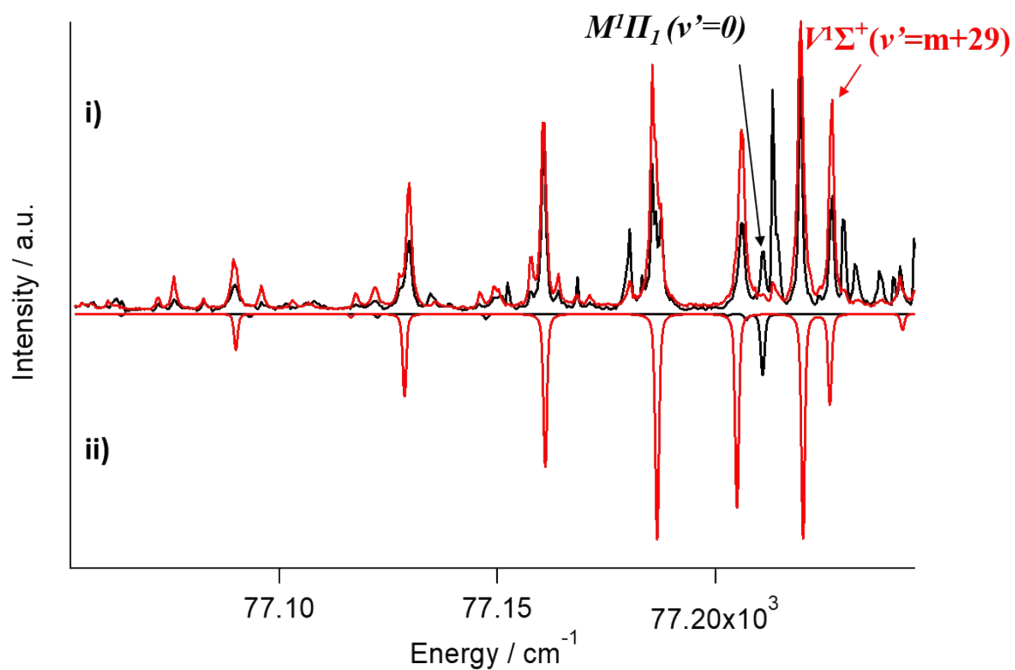

**Fig. S3 c)** Simulation of  $M^1\Pi_1 [1/2]7s\sigma(v'=0)$  and  $V^1\Sigma^+(v'=m+29)$  system, i) Experimental data; ii) calculated.

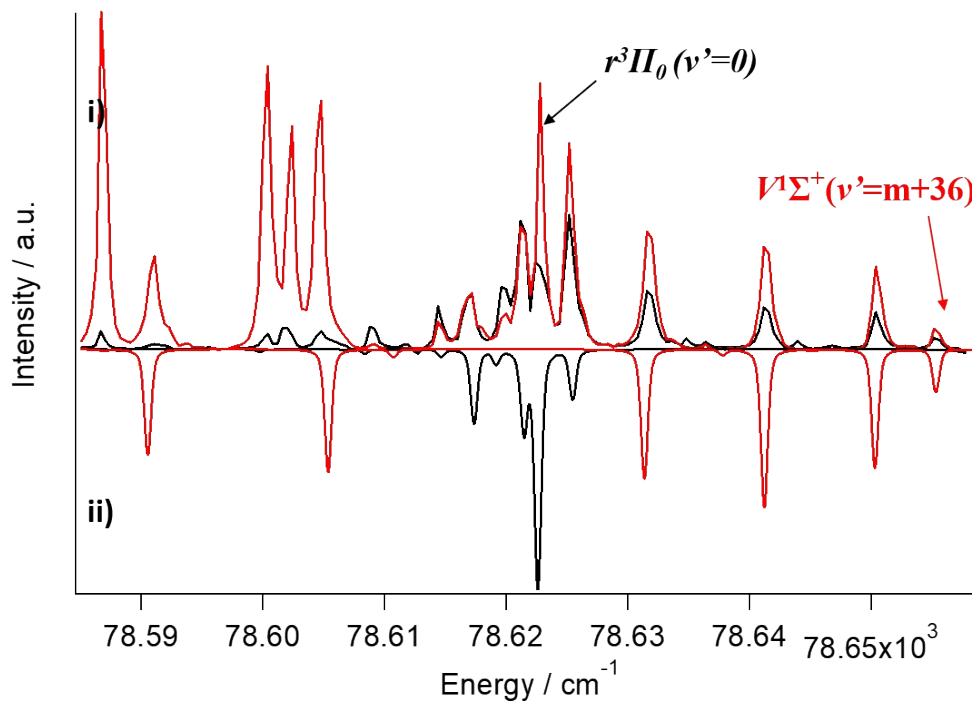

**Fig. S3 d)** Simulation of  $r^3\Pi_0 [1/2]7p\sigma(v'=0)$  and  $V^1\Sigma^+(v'=m+36)$  system, i) Experimental data; ii) calculated.

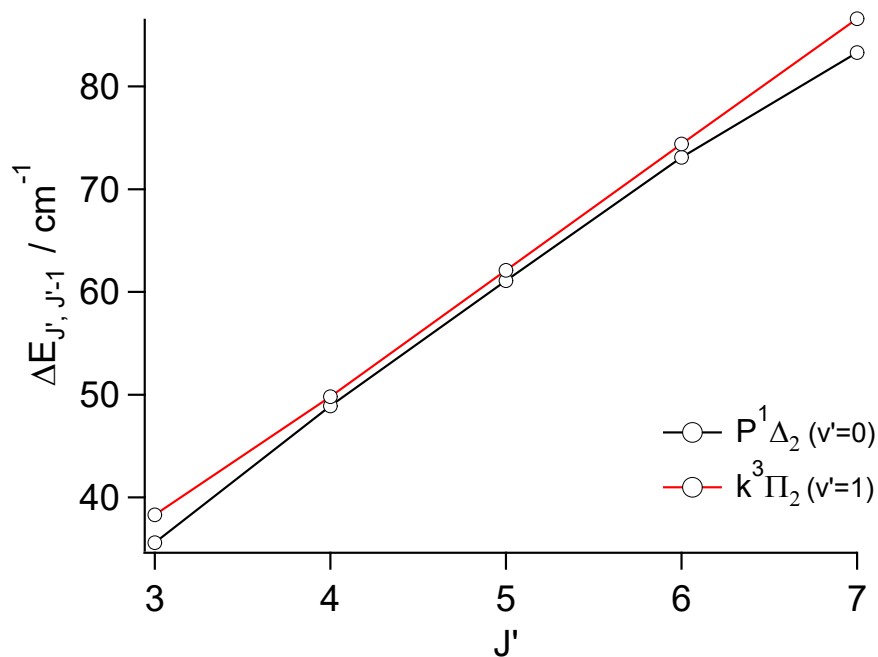

**Fig. S4 a)** Perturbation effects due to the  $P^1\Delta_2 [1/2]4f\pi(v'=0)$  and  $k^3\Pi_2 [1/2]5d\delta(v'=1)$  state interaction. Spacing between rotational levels ( $\Delta E_{J', J-1}$ ) as a function of  $J'$ ; experimental values

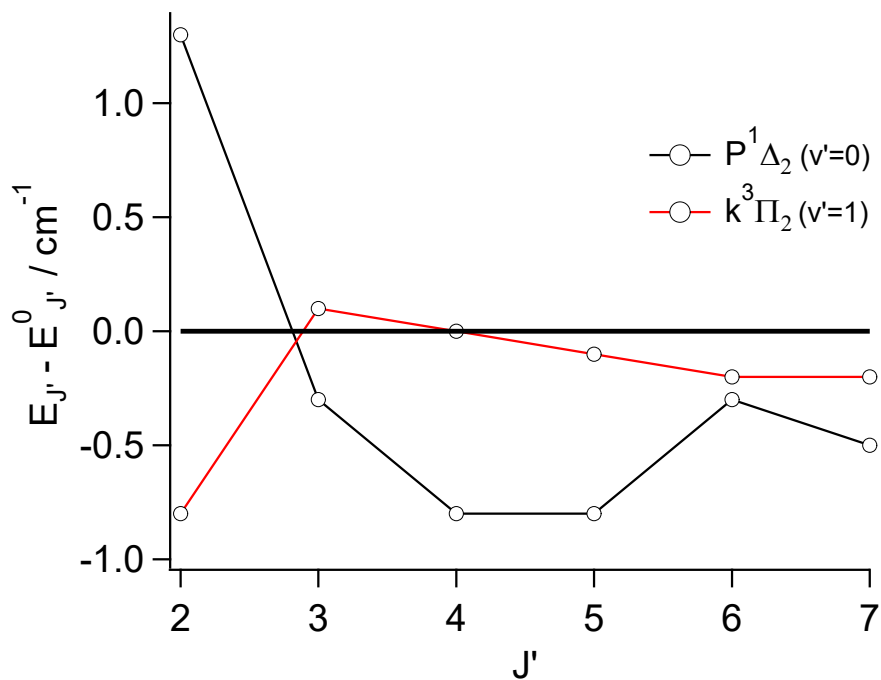

**Fig.S4 b)** Perturbation effects due to the  $P^1\Delta_2 [1/2]4f\pi(v'=0)$  and  $k^3\Pi_2 [1/2]5d\delta(v'=1)$  state interaction. Reduced term value plots: Deperturbed energy level values subtracted from experimental energy level values

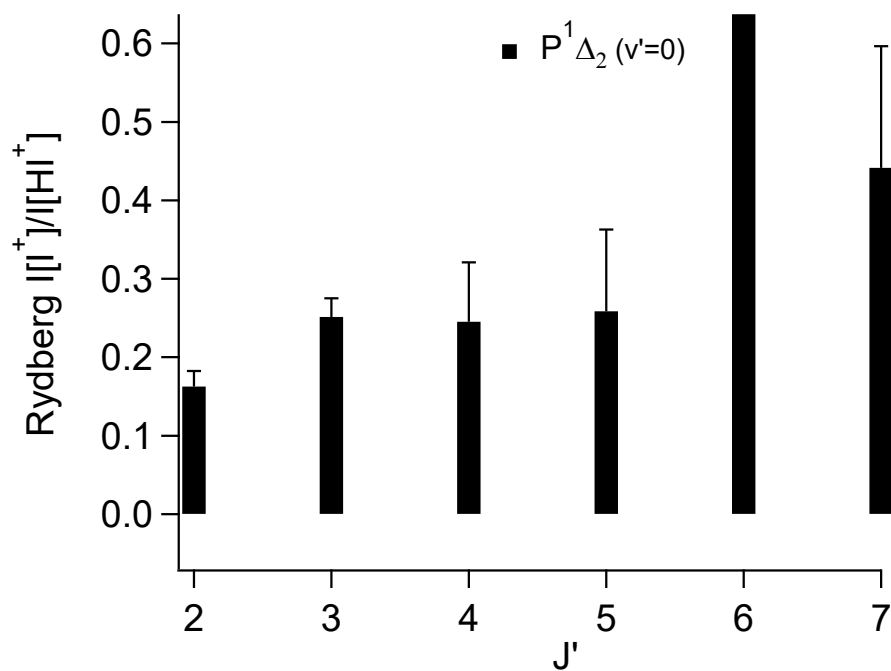

**Fig. S4 c)** Perturbation effects due to the  $P^1\Delta_2 [1/2]4f\pi(v'=0)$  and  $k^3\Pi_2 [1/2]5d\delta(v'=1)$  state interaction. Relative ion-signal intensities ( $I(I^+)/I(HI^+)$ ) vs.  $J'$  derived from the  $Q$ -rotational lines for the  $P^1\Delta_2 [1/2]4f\pi(v'=0)$  spectrum.

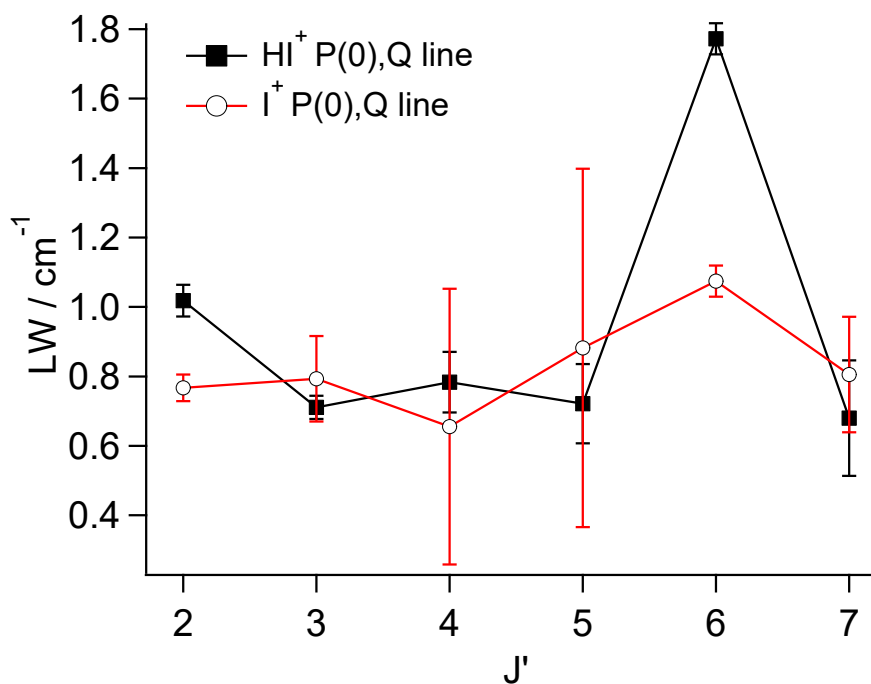

**Fig. S4 d)** Perturbation effects due to the  $P^1\Delta_2 [1/2]4f\pi(v'=0)$  and  $k^3\Pi_2 [1/2]5d\delta(v'=1)$  state interaction. Rotational line-widths vs.  $J'$  derived from the  $Q$  lines of the  $I^+$  signals for the  $P^1\Delta_2 [1/2]4f\pi(v'=0)$  state spectrum.

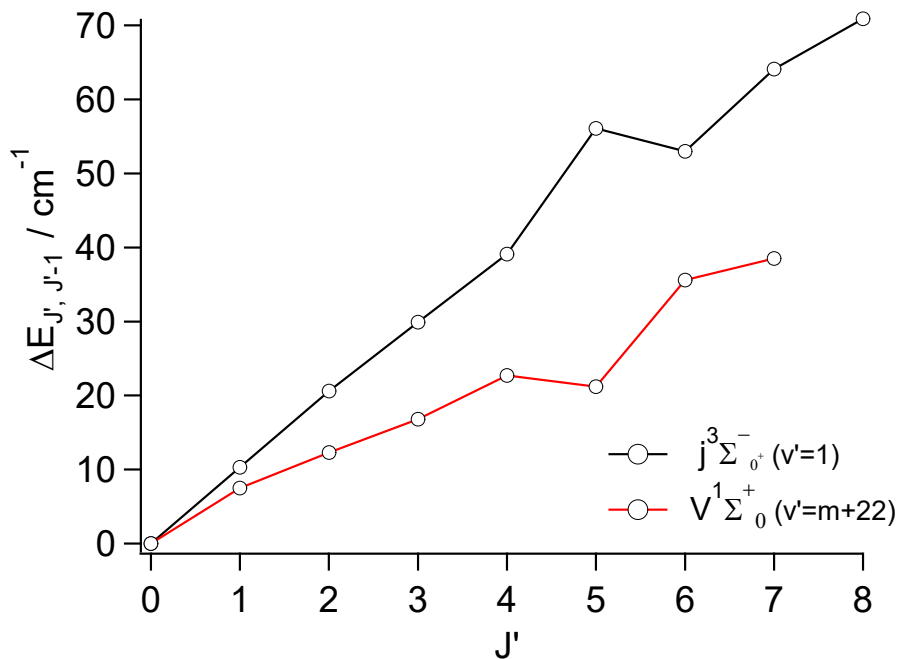

**Fig. S5 a)** Perturbation effects due to the  $j^3\Sigma_0^+[1/2]5d\pi(v'=1)$  and  $V^1\Sigma^+(v'=m+22)$  state interaction. Spacing between rotational levels ( $\Delta E_{J', J-1}$ ) as a function of  $J'$ .

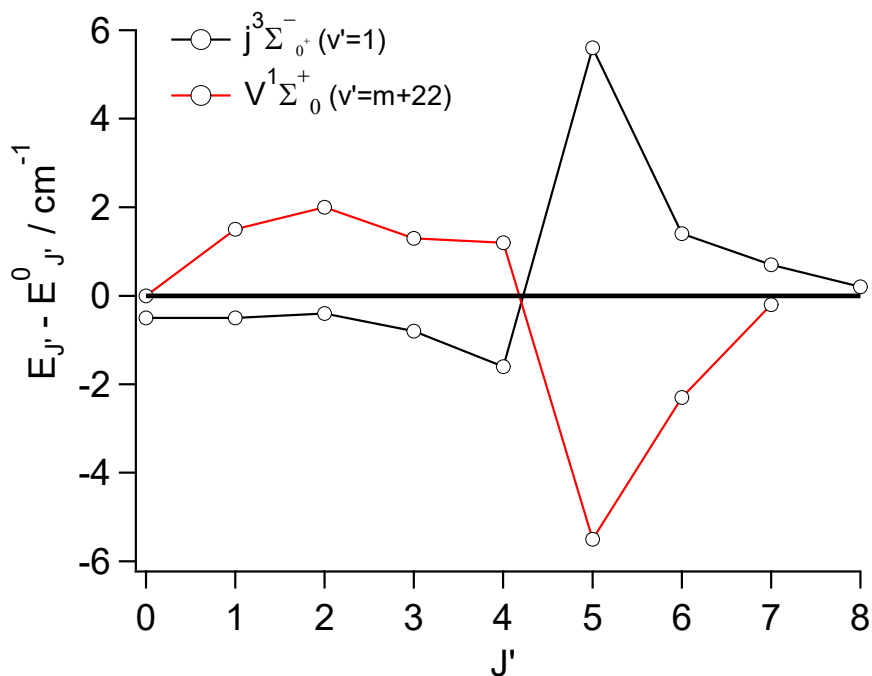

**Fig. S5 b)** Perturbation effects due to the  $j^3\Sigma_0^+[1/2]5d\pi(v'=1)$  and  $V^1\Sigma^+(v'=m+22)$  state interaction. Reduced term value plots: Deperturbed energy level values subtracted from experimental energy level values.

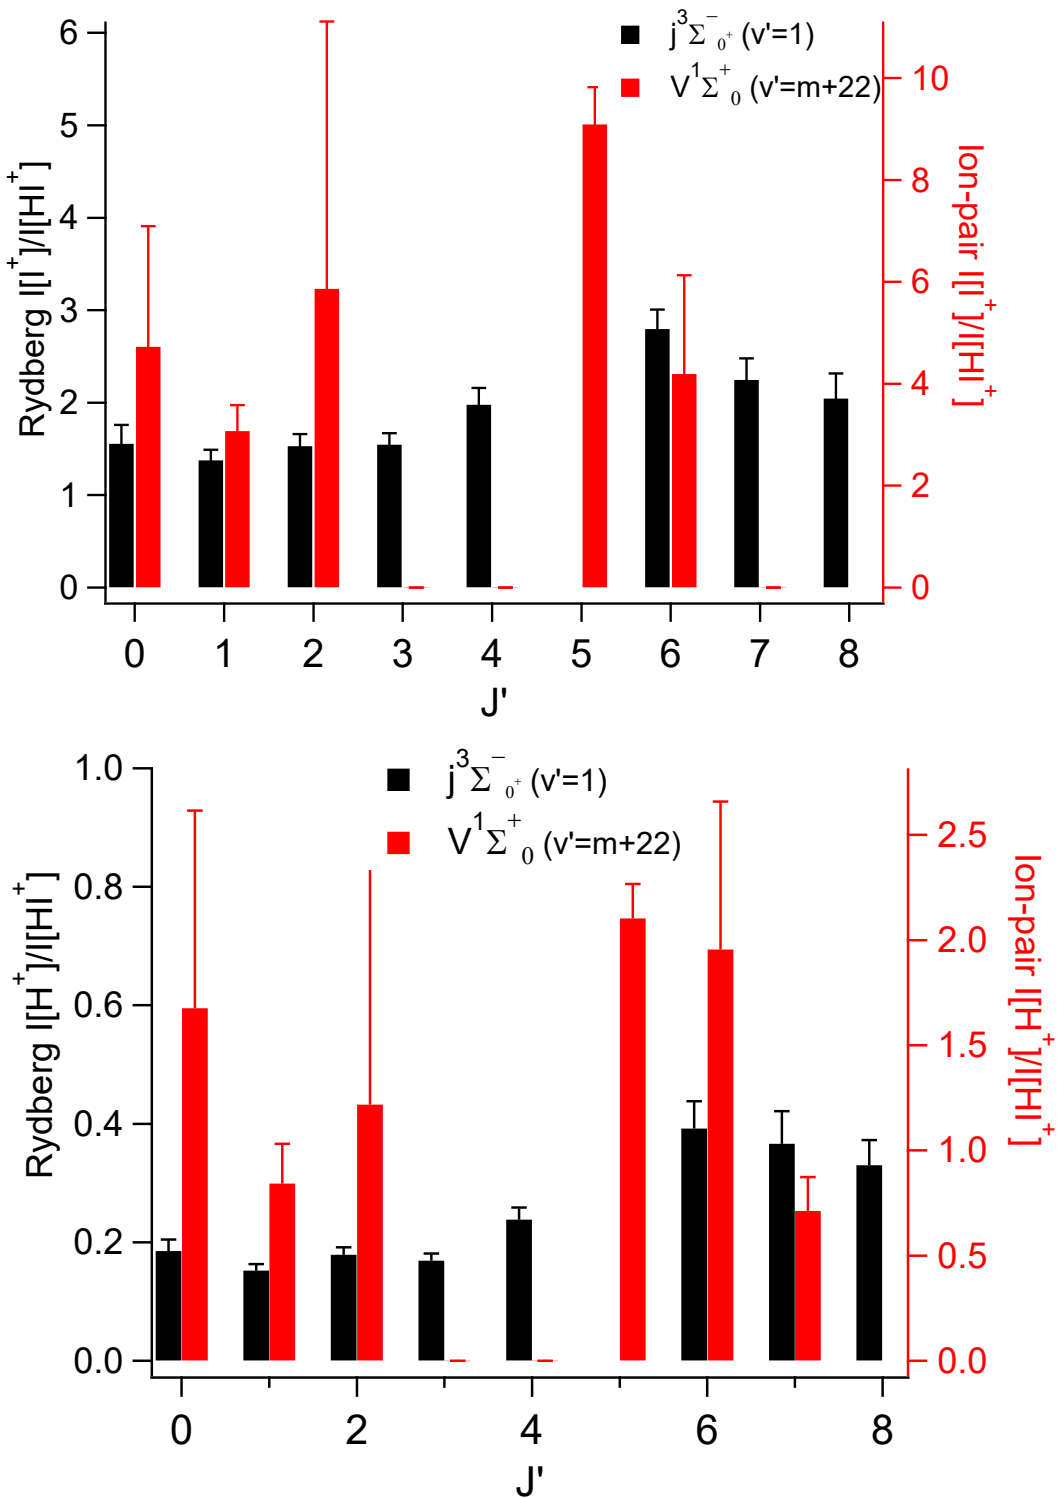

**Fig. S5 c)** Perturbation effects due to the  $j^3\Sigma_0^+[1/2]5d\pi(v'=1)$  and  $V^1\Sigma^+(v'=m+22)$  state interaction. Relative ion-signal intensities ( $I(I^+)/I(HI^+)$  and  $I(H^+)/I(HI^+)$ ) vs.  $J'$  derived from the  $Q$ -rotational lines for the  $j^3\Sigma_0^+[1/2]5d\pi(v'=1)$  and  $V^1\Sigma^+(v'=m+22)$  spectra.



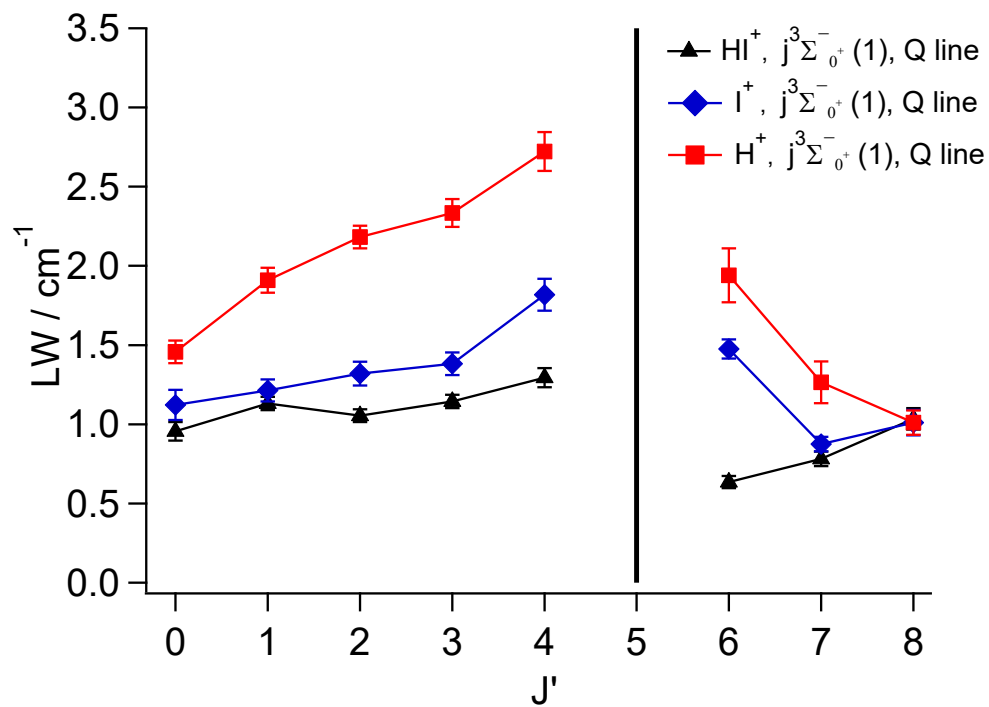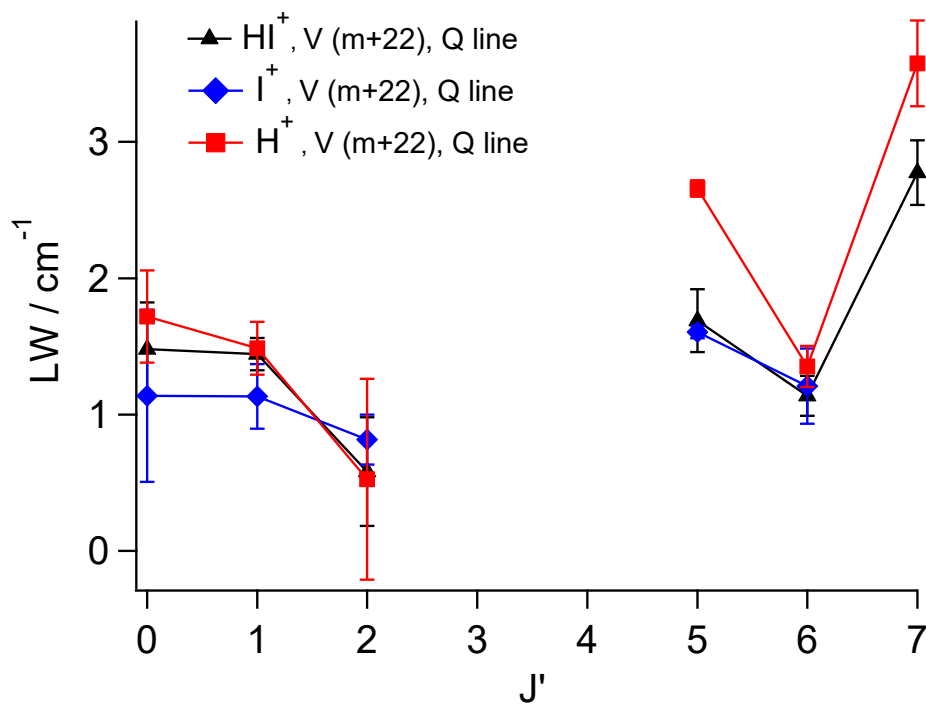

**Fig. S5 d)** Perturbation effects due to the  $j^3\Sigma_0^+[1/2]5d\pi(v'=1)$  and  $V^1\Sigma^+(v'=m+22)$  state interaction. Rotational line widths vs  $J'$  derived from the  $Q$  lines of ion-spectra for the  $j^3\Sigma_0^+[1/2]5d\pi(v'=1)$  and  $V^1\Sigma^+(v'=m+22)$  state spectra.

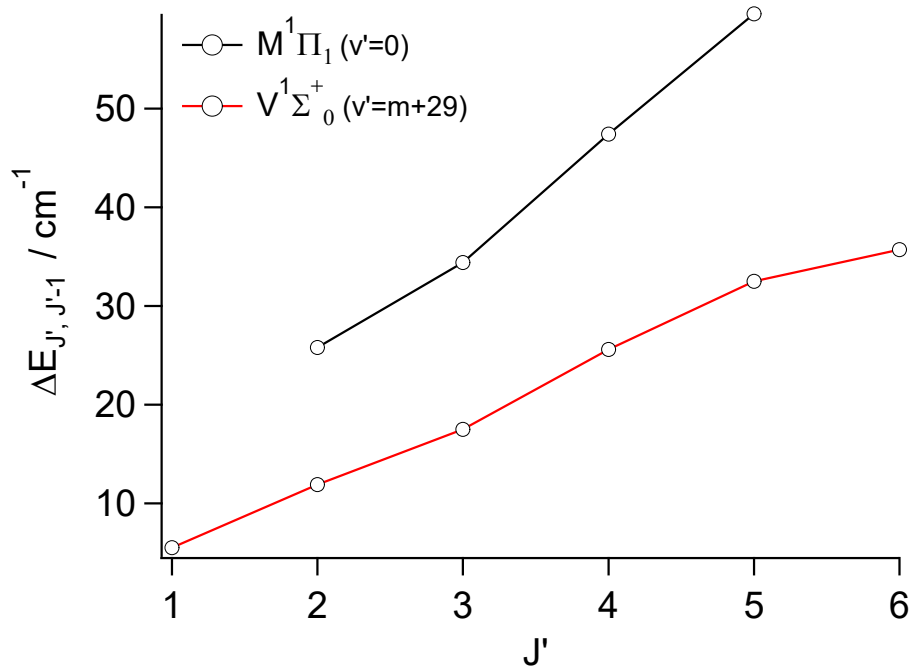

**Fig. S6 a)** Perturbation effects due to the  $M^1\Pi_1 [1/2]7s\sigma(v'=0)$  and  $V^1\Sigma^+(v'=m+29)$  states interaction. Spacing between rotational levels ( $\Delta E_{J', J'-1}$ ) as a function of  $J'$ .

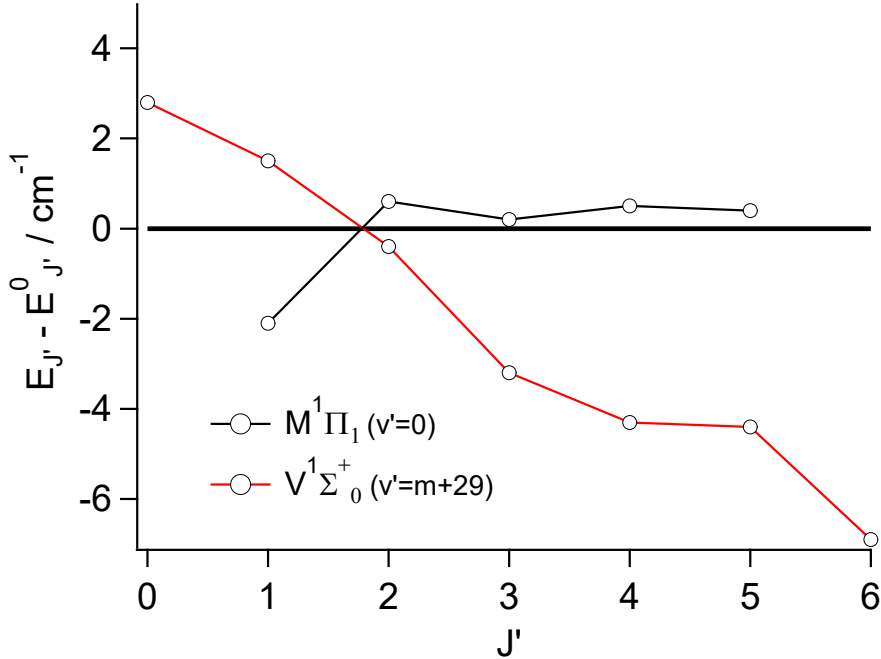

**Fig. S6 b)** Perturbation effects due to the  $M^1\Pi_1 [1/2]7s\sigma(v'=0)$  and  $V^1\Sigma^+(v'=m+29)$  states interaction. Reduced term value plots: Deperturbed energy level values subtracted from experimental energy level values.

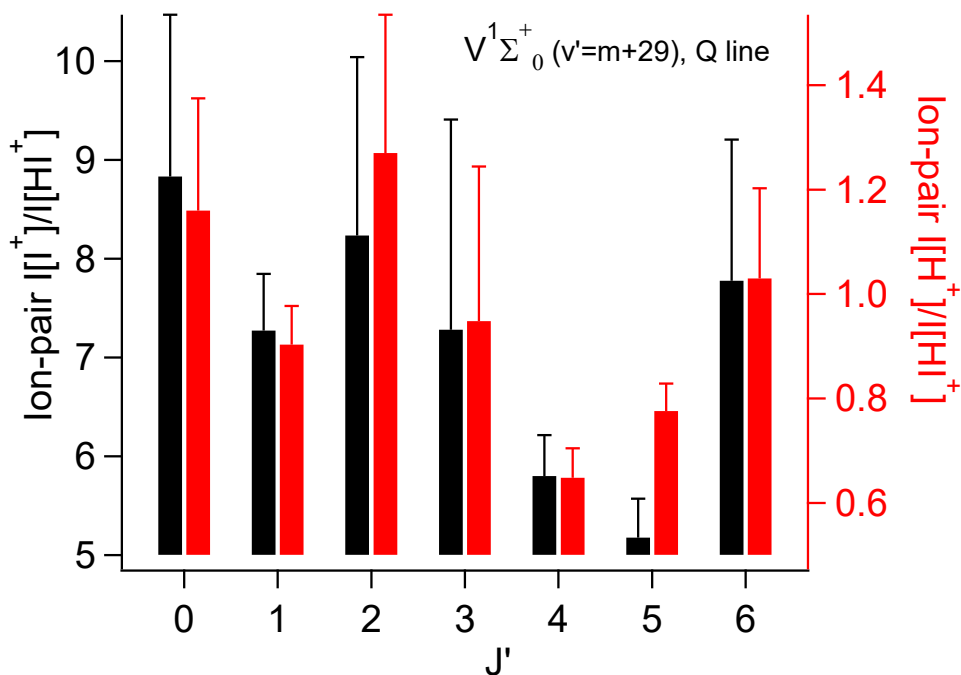

**Fig. S6 c)** Perturbation effects due to the  $M^1\Pi_1 [1/2]7s\sigma(v'=0)$  and  $V^1\Sigma^+(v'=m+29)$  states interaction. Relative ion-signal intensities ( $I(I^+)/I(HI^+)$  and  $I(H^+)/I(HI^+)$ ) vs.  $J'$  derived from the  $Q$ -rotational lines for the  $V^1\Sigma^+(v'=m+29)$  spectrum.

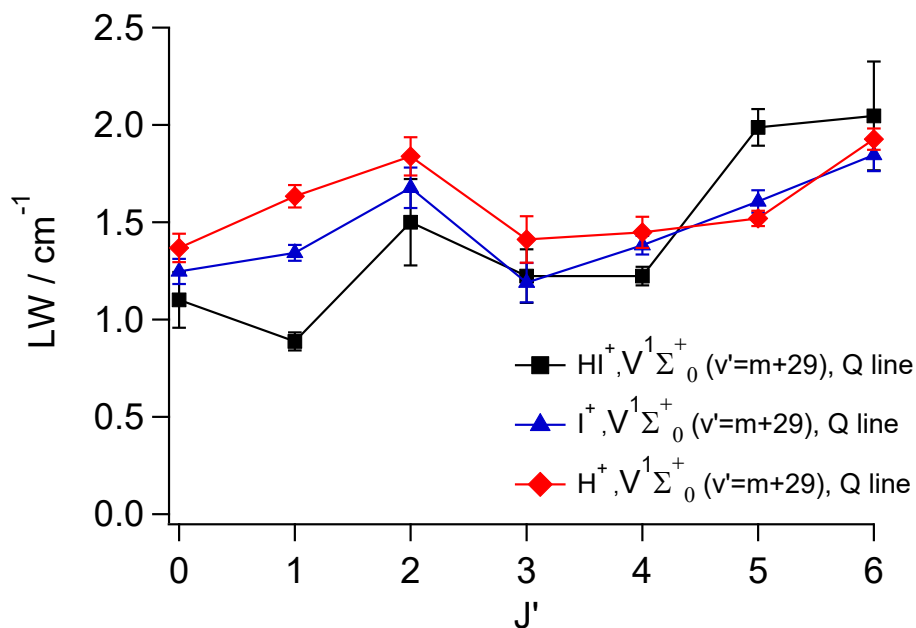

**Fig. S6 d)** Perturbation effects due to the  $M^1\Pi_1 [1/2]7s\sigma(v'=0)$  and  $V^1\Sigma^+(v'=m+29)$  states interaction. Rotational line-widths vs  $J'$  derived from the  $Q$  lines of the ion-spectra for the  $V^1\Sigma^+(v'=m+29)$  state.

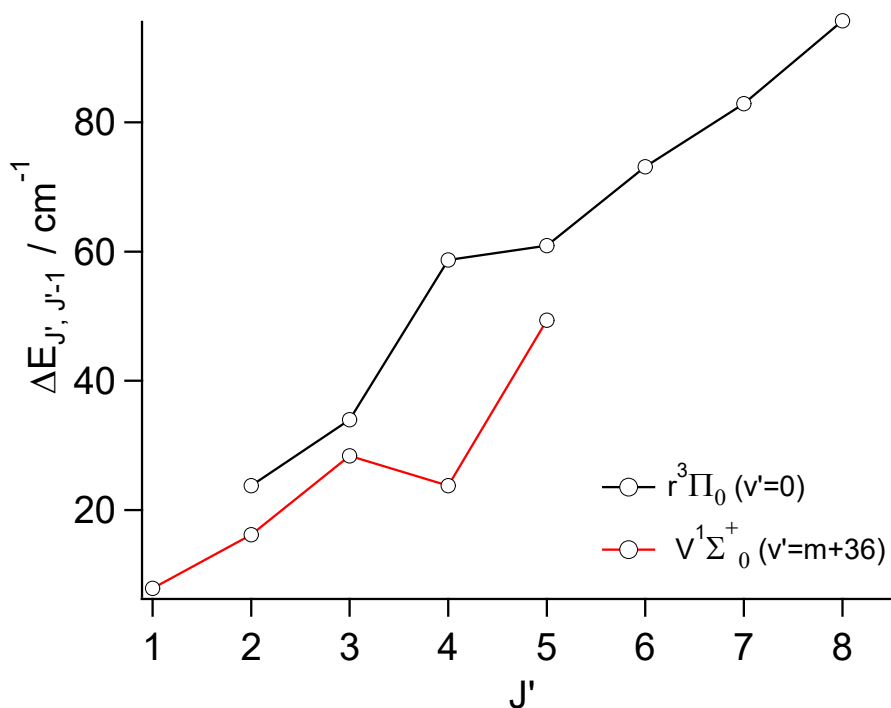

**Fig. S7 a)** Perturbation effects due to the  $r^3\Pi_0 [1/2]7p\sigma(v'=0)$  and  $V^1\Sigma^+(v'=m+36)$  state interaction. Spacing between rotational levels ( $\Delta E_{J', J'-1}$ ) as a function of  $J'$ .

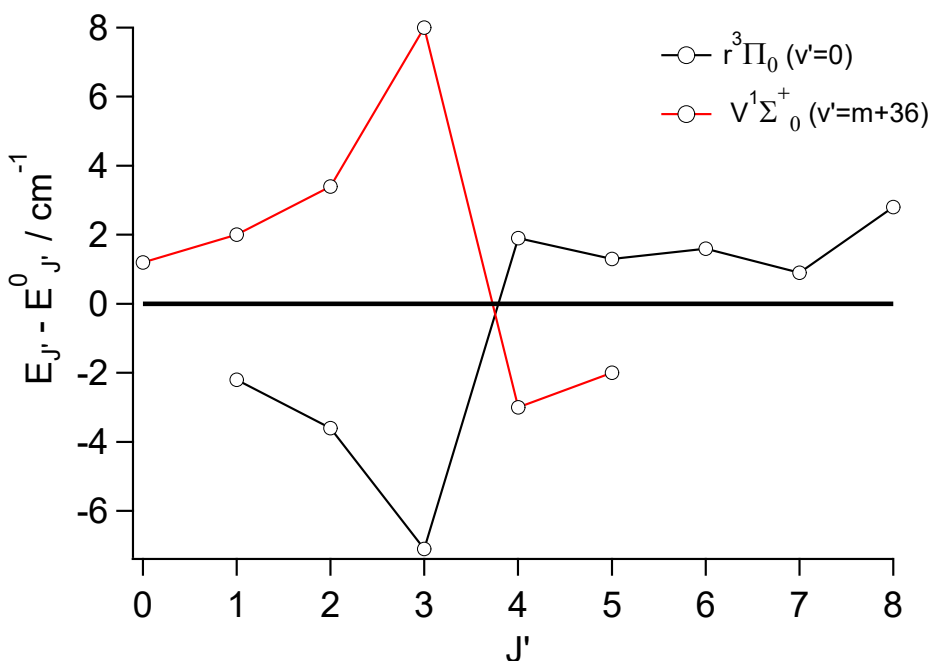

**Fig. S7 b)** Perturbation effects due to the  $r^3\Pi_0 [1/2]7p\sigma(v'=0)$  and  $V^1\Sigma^+(v'=m+36)$  state interaction. Reduced term value plots: Deperturbed energy level values subtracted from experimental energy level values.

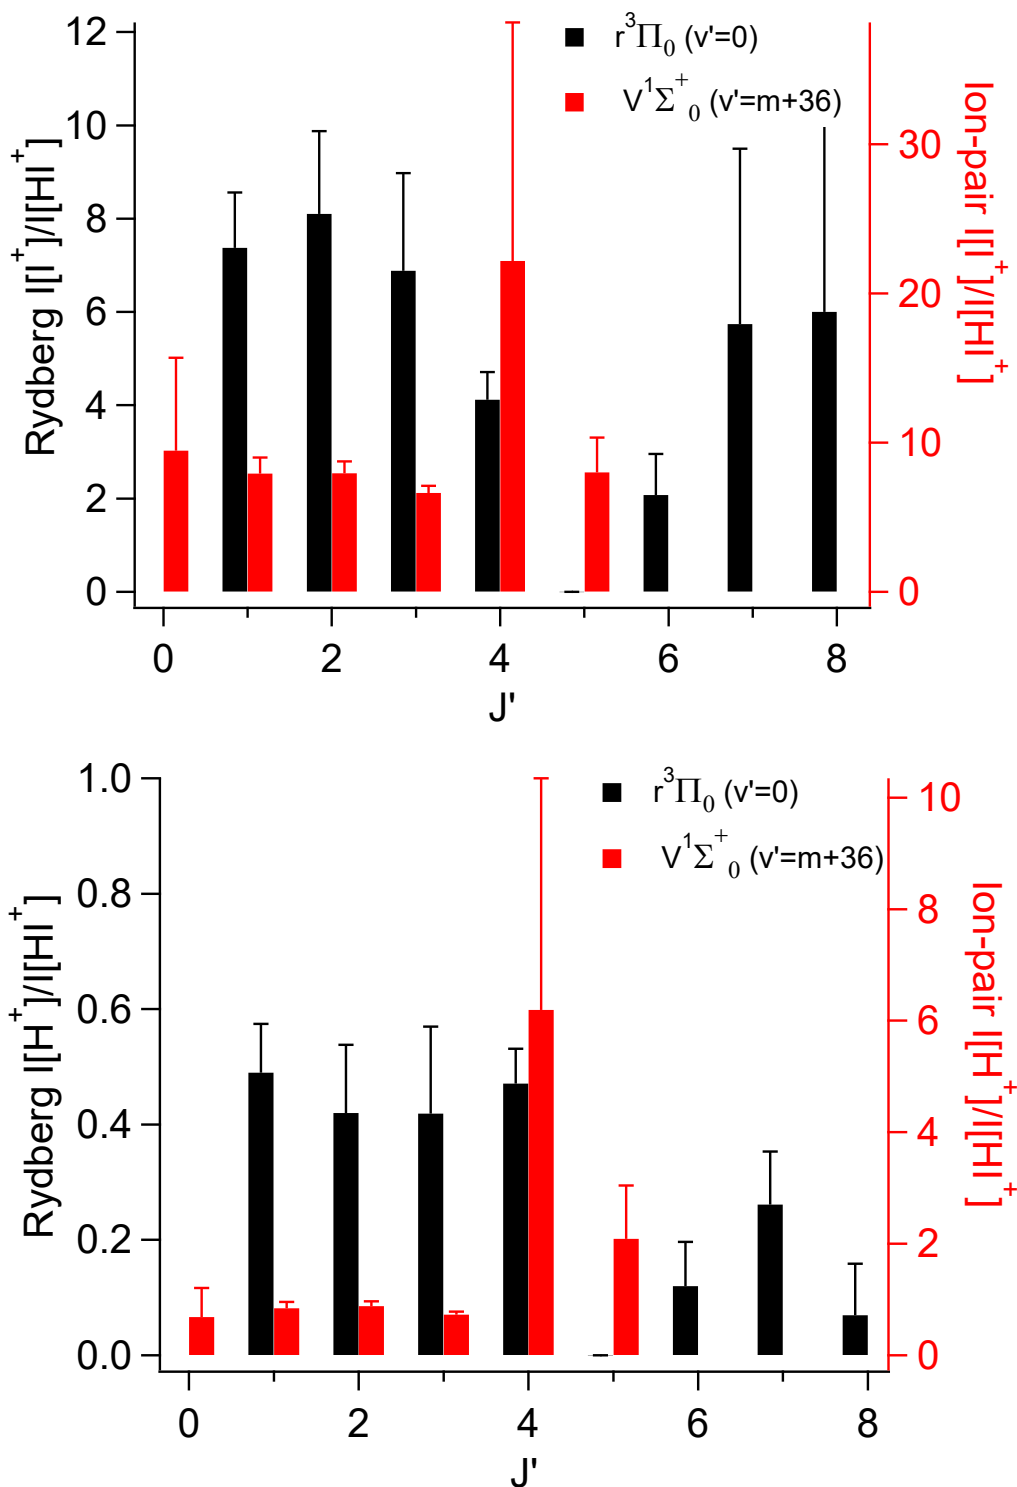

**Fig. S7 c)** Perturbation effects due to the  $r^3\Pi_0 [1/2]7p\sigma(v'=0)$  and  $V^1\Sigma^+(v'=m+36)$  state interaction. Relative ion-signal intensities ( $I(I^+)/I(HI^+)$  and  $I(H^+)/I(HI^+)$ ) vs.  $J'$  derived from the  $Q$ -rotational lines for the  $r^3\Pi_0 [1/2]7p\sigma(v'=0)$  and  $V^1\Sigma^+(v'=m+36)$  spectra.

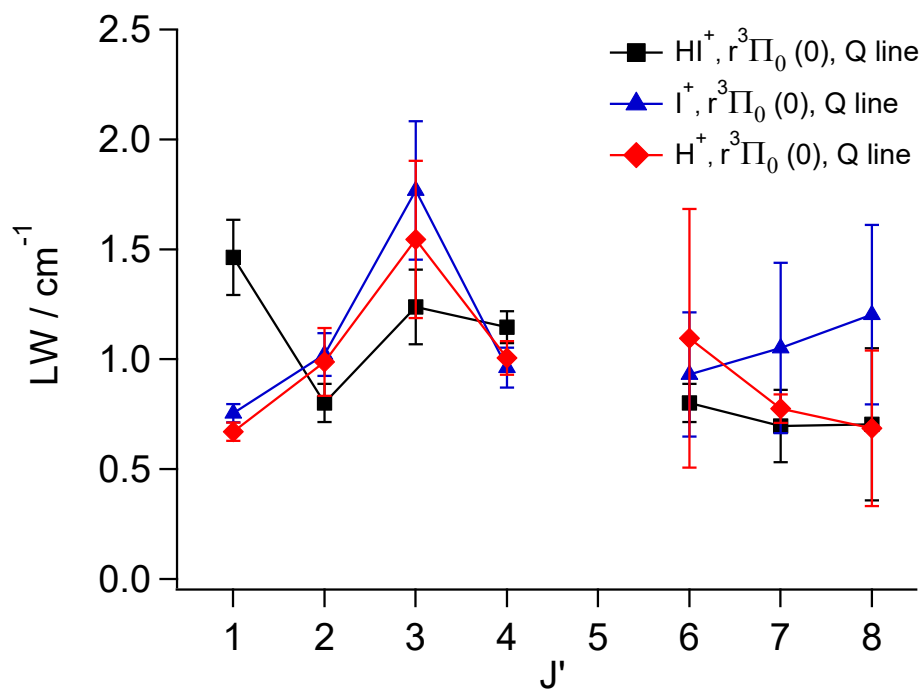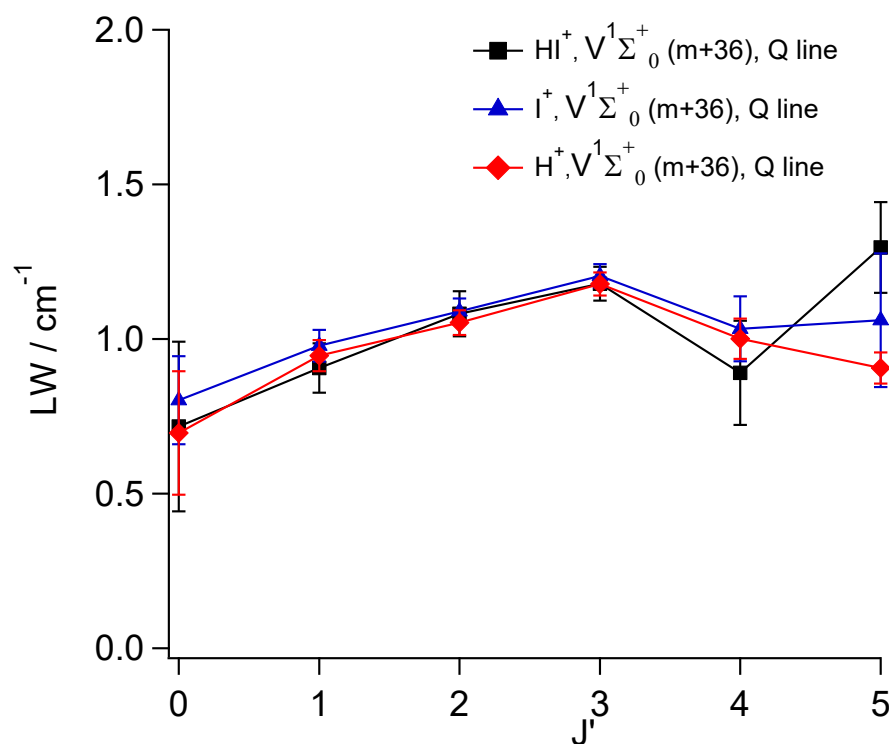

**Fig. S7 d)** Perturbation effects due to the  $r^3\Pi_0 [1/2]7p\sigma(v'=0)$  and  $V^1\Sigma^+(v'=m+36)$  state interaction. Rotational line widths vs.  $J'$  derived from the  $Q$  lines of the ion-spectra for the  $r^3\Pi_0 [1/2]7p\sigma(v'=0)$  and  $V^1\Sigma^+(v'=m+36)$  states.

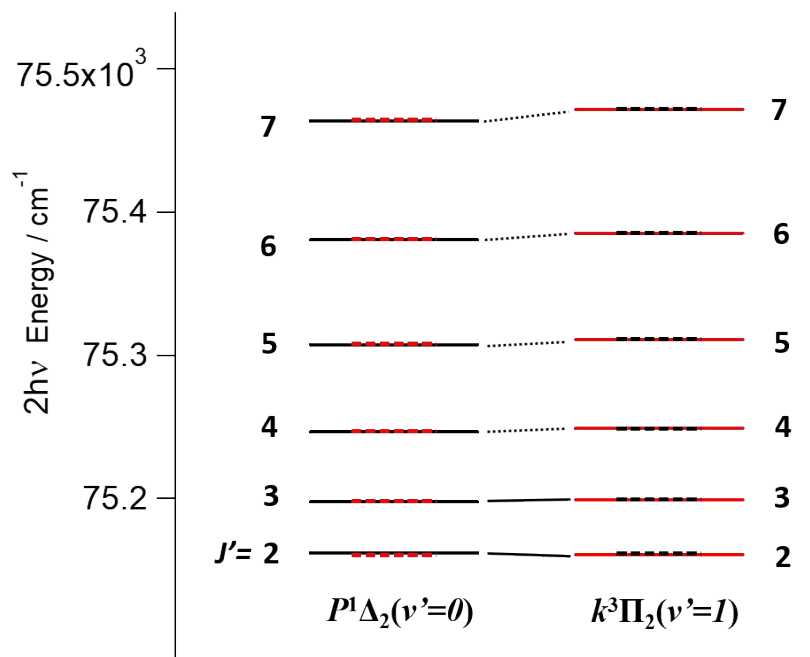

**Fig. S8 a)** Energy level diagram showing deperturbed (broken lines) and perturbed (solid lines) rotational energy levels for  $P^1\Delta_2 [1/2]4f\pi(v'=0)$  and  $k^3\Pi_2 [1/2]5d\delta(v'=1)$ .

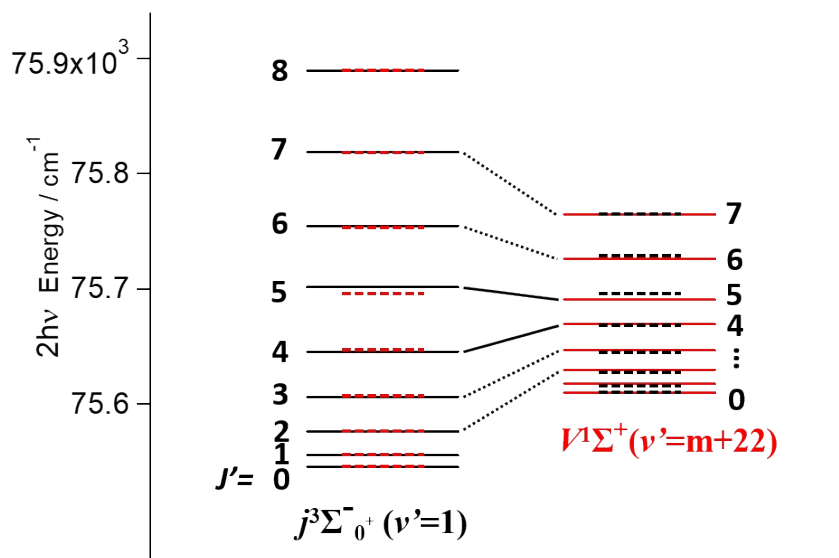

**Fig. S8 b)** Energy level diagram showing deperturbed (broken lines) and perturbed (solid lines) rotational energy levels for  $j^3\Sigma_0^+ [1/2]5d\pi(v'=1)$  and  $V^1\Sigma^+(v'=m+22)$ .

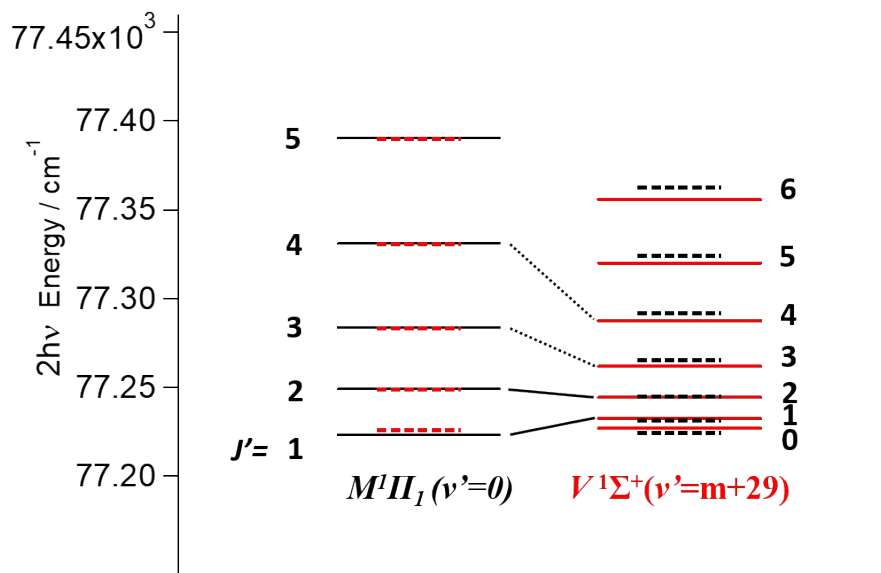

**Fig. S8 c)** Energy level diagram showing deperturbed (broken lines) and perturbed (solid lines) rotational energy levels for  $M^1\Pi_1 [1/2]7s\sigma(v'=0)$  and  $V^1\Sigma^+(v'=m+29)$ .

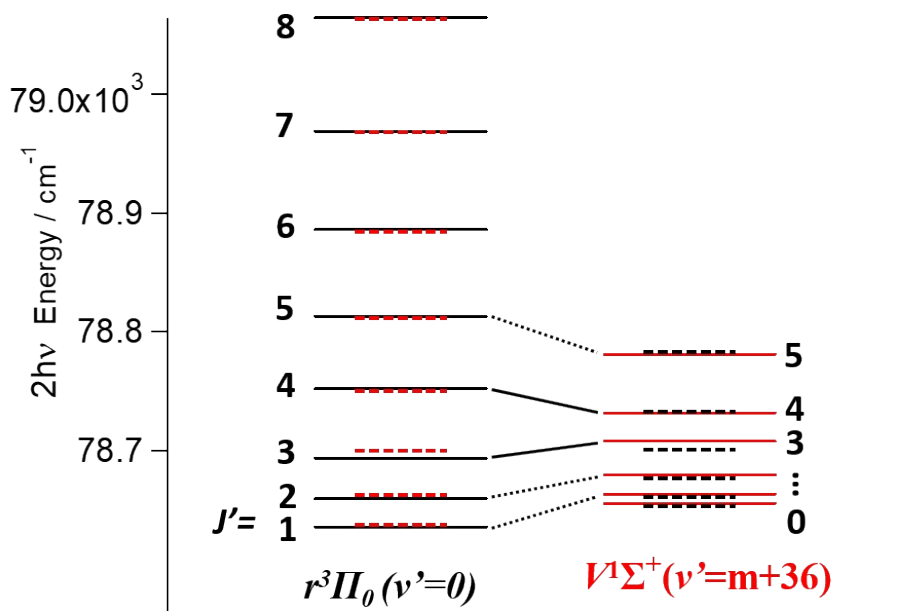

**Fig. S8 d)** Energy level diagram showing deperturbed (broken lines) and perturbed (solid lines) rotational energy levels for  $r^1\Pi_0 [1/2]7p\sigma(v'=0)$  and  $V^1\Sigma^+(v'=m+36)$ .



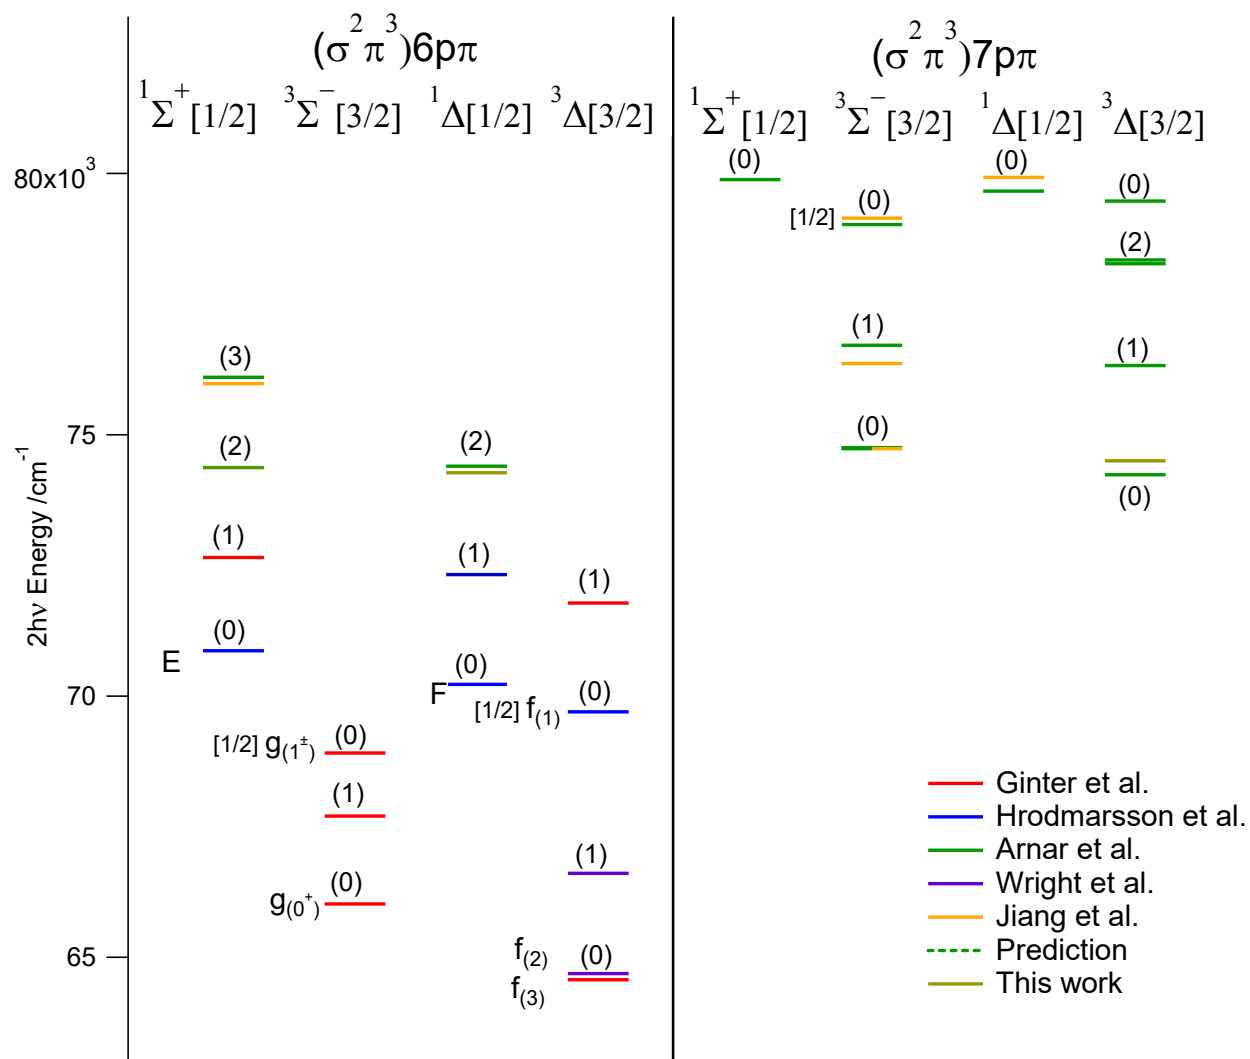

**Fig. S9 a)**  $^{1,3}\Sigma$  and  $^{1,3}\Delta$ ,  $[\Omega_c]np\pi$  ( $n = 6, 7$ ) Rydberg states of HI.

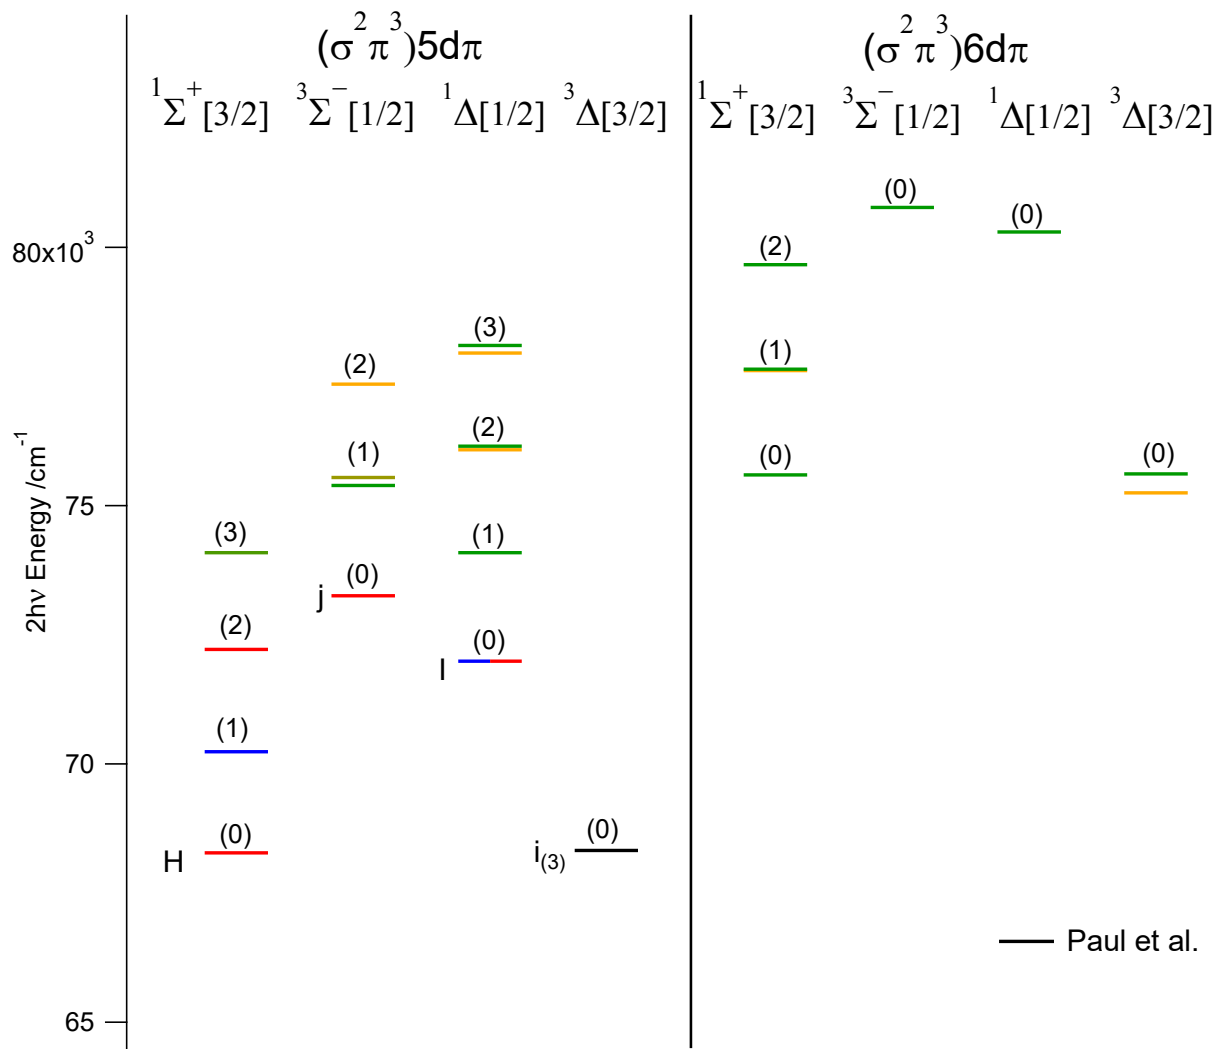

**Fig. S9 b)**  $1,3\Sigma$  and  $1,3\Delta$ ,  $[\Omega_c]n d\pi$  ( $n = 5, 6$ ) Rydberg states of HI.

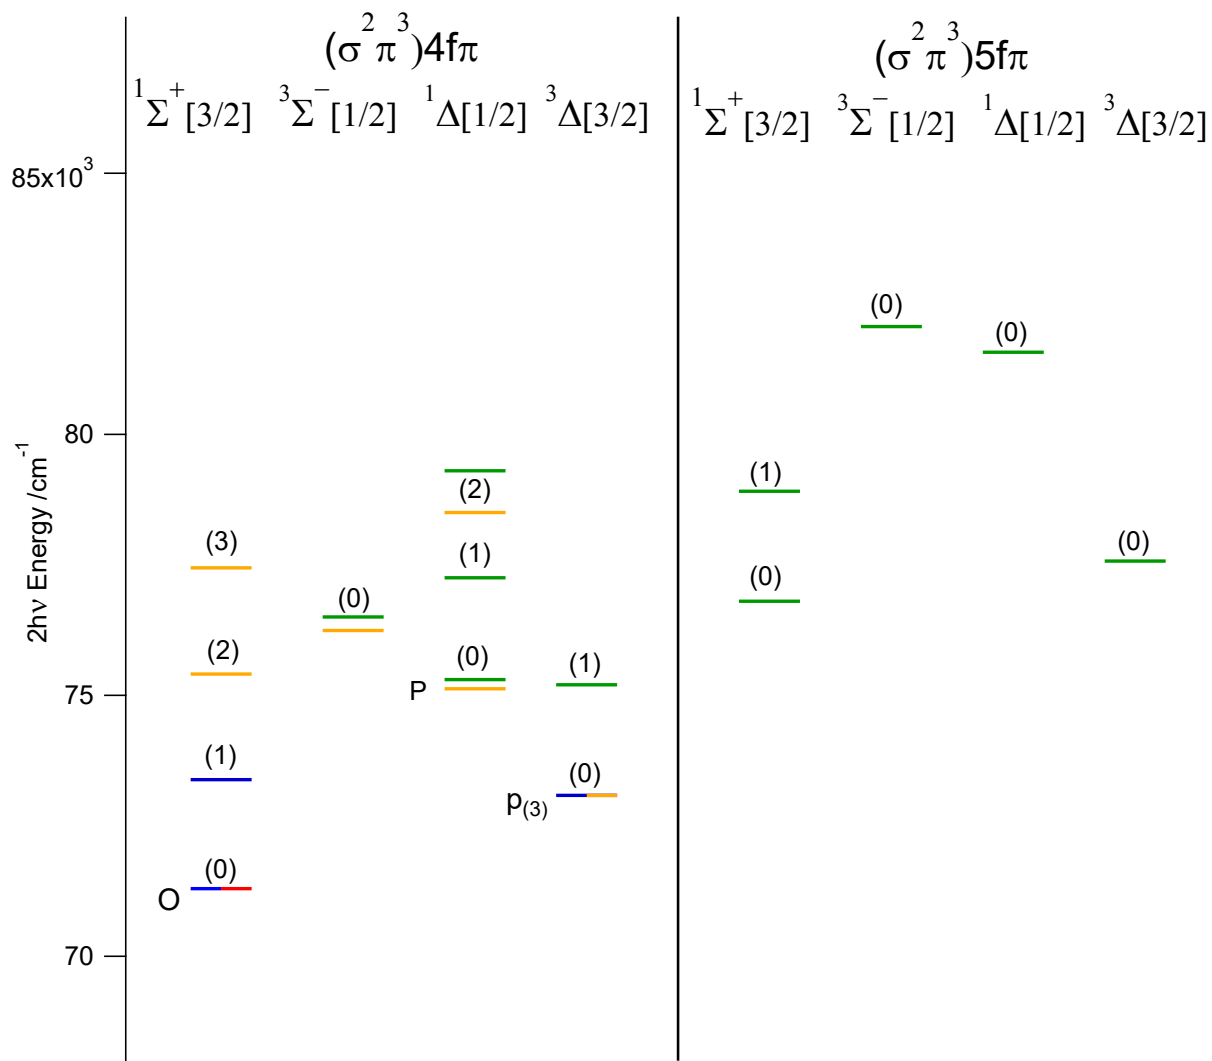

**Fig. S9 c)**  $1,3\Sigma$  and  $1,3\Delta$ ,  $[\Omega_c]nf\pi$  ( $n = 4, 5$ ) Rydberg states of HI.

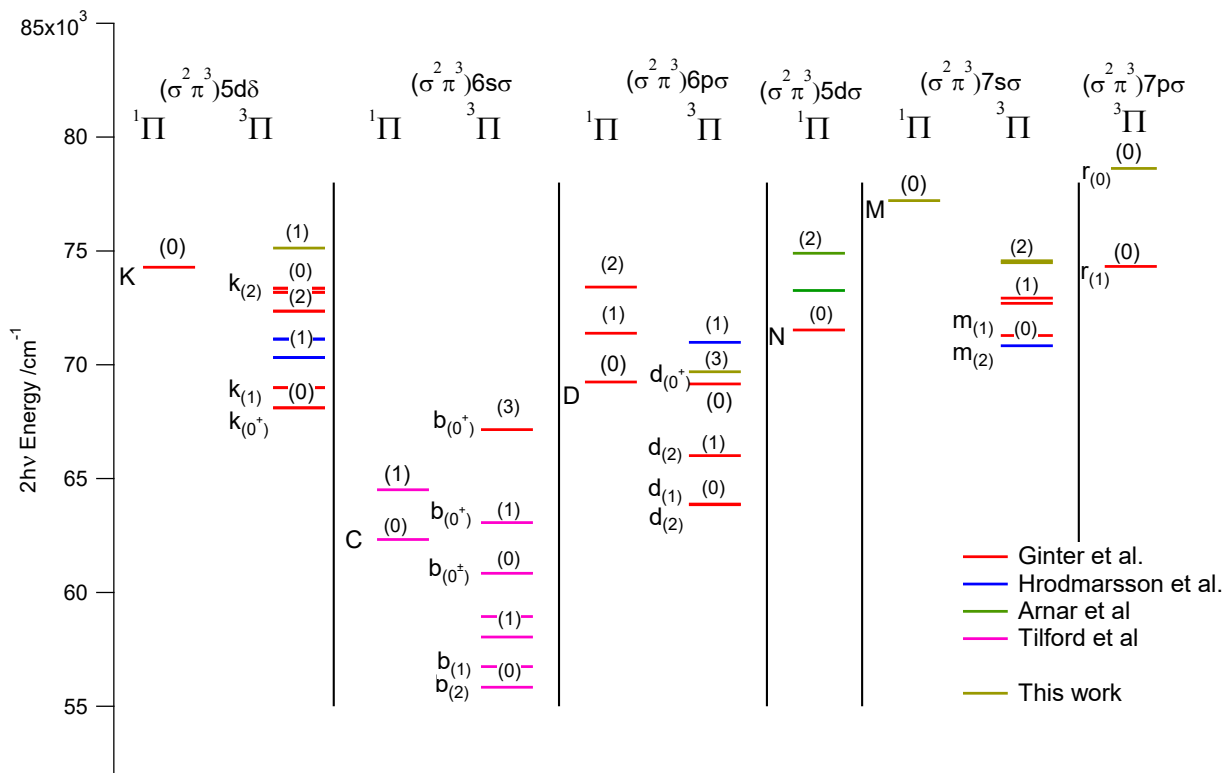

**Fig. S9 d)**  $1,3\Pi$  Rydberg states of HI with  $\sigma$  and  $\delta$  Rydberg electrons.

**Fig. S9:** Energy level diagram of known Rydberg states for HI converging to the ground ionic states  $X^2\Pi [3/2, 1/2]$  as well as some predicted states.

a)  $1,3\Sigma$  and  $1,3\Delta$ ,  $[\mathcal{Q}_c]np\pi$  ( $n = 6, 7$ ) Rydberg states.

b)  $1,3\Sigma$  and  $1,3\Delta$ ,  $[\mathcal{Q}_c]nd\pi$  ( $n = 5, 6$ ) Rydberg states.

c)  $1,3\Sigma$  and  $1,3\Delta$ ,  $[\mathcal{Q}_c]nf\pi$  ( $n = 4, 5$ ) Rydberg states.

d)  $1,3\Pi$  Rydberg states with  $\sigma$  and  $\delta$  Rydberg electrons.

Solid lines (different colors) correspond to previously detected bands [1-11] and present work (orange lines), as specified in the figures. Green dotted lines correspond to predicted states according to quantum defect analyses.

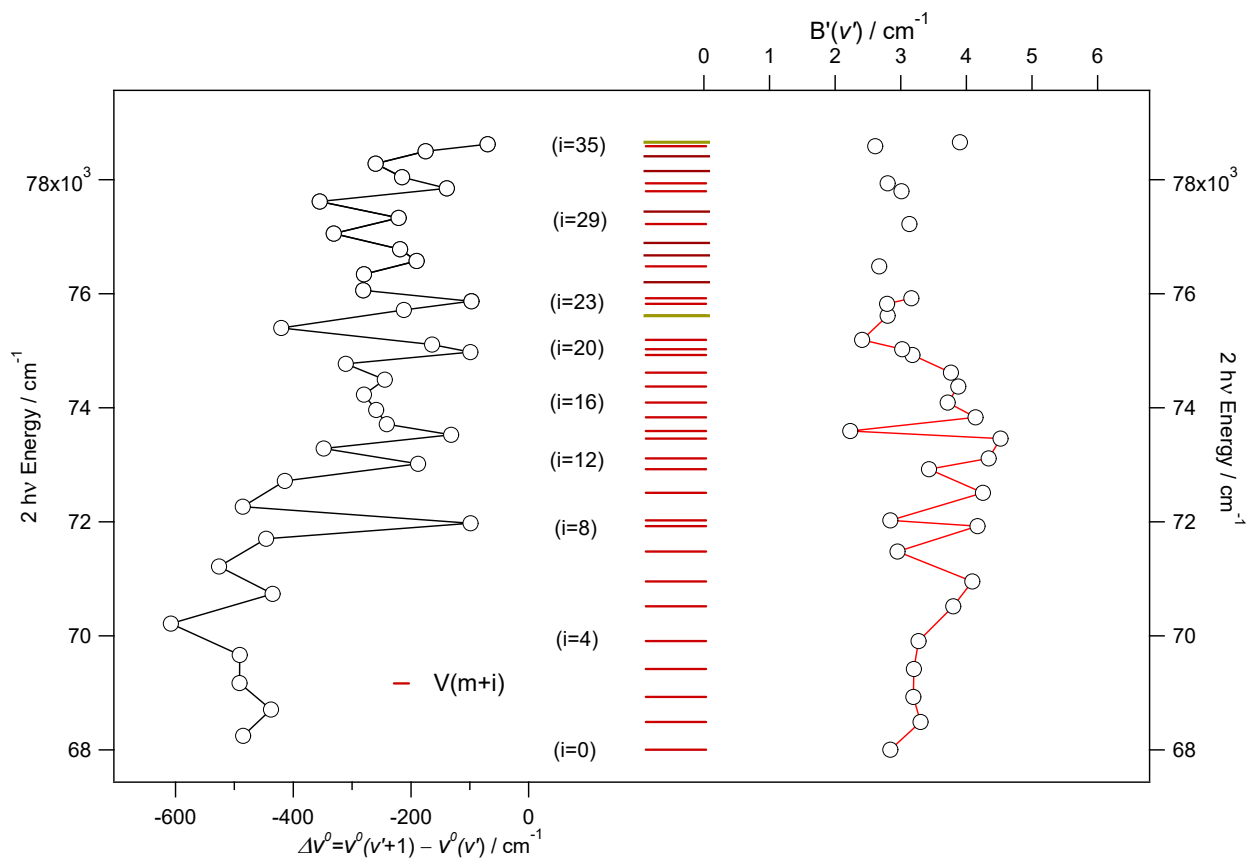

**Fig. S10** Vibrational energy levels the  $V^1\Sigma^+_{0+}(\sigma\pi^f)\sigma^*$  (red) ion-pair state as well as vibrational energy level spacing ( $\Delta v^0(v'+1, v') = v^0(v'+1, v') - v^0(v')$ ) for the  $V^1\Sigma^+$  ion-pair state (black curve rotated to the left) and rotational constants ( $B'(v')$ ) (rotated to the right) (● – observed, ○ – predicted or guessed).

**Tables:**

**Table S1. Rotational lines of Rydberg and ion-pair state spectra:**

**(a – c):** Rotational lines for new Rydberg state spectra, (a)  $d^3\Pi_1[3/2]6p\sigma(v'=3)$ , (b)  $f^3\Delta_2[3/2]7p\pi(v'=2)$  and (c)  $m^3\Pi_{2,1}[3/2]7s\sigma(v'=2)$ .

**(d – g):** Rotational lines of Rydberg and ion-pair state spectra which exhibit state interactions, (d)  $P^1\Delta_2[1/2]4f\pi(v'=0)$  and  $k^3\Pi_2[1/2]5d\delta(v'=1)$ , (e)  $j^3\Sigma_0^+[1/2]5d\pi(v'=1)$  and  $V^1\Sigma^+(v'=m+22)$ , (f)  $M^1\Pi_1[1/2]7s\sigma(v'=0)$  and  $V^1\Sigma^+(v'=m+29)$  (g)  $r^1\Pi_1[1/2]7p\sigma(v'=0)$  and  $V^1\Sigma^+(v'=m+36)$

**Table S1a.** Rotational line wavenumbers for the HI  $d^3\Pi_1[3/2]6p\sigma\leftarrow\leftarrow X^1\Sigma^+(3,0)$  spectrum.

| <b>J'</b> | <b>O (J)</b> | <b>P (J)</b> | <b>Q (J)</b> | <b>R (J)</b> | <b>S (J)</b> |
|-----------|--------------|--------------|--------------|--------------|--------------|
| 0         |              |              |              |              |              |
| 1         | 69624.5      | 69662.5      | 69691.1      | 69714.5      |              |
| 2         | 69597.9      | 69647.5      | 69689.9      | 69724.3      | 69729.5      |
| 3         | 69572.7      | 69631.6      |              | 69733.6      | 69752.9      |
| 4         | 69546.2      | 69614.7      |              | 69741.0      | 69775.2      |
| 5         | 69516.6      |              |              | 69747.4      | 69796.1      |
| 6         |              |              |              |              | 69818.1      |
| 7         |              |              |              |              | 69839.6      |
| 8         |              |              |              |              |              |

**Table S1b.** Rotational line wavenumbers for the HI  $f^3\Delta_2[3/2]7p\pi\leftarrow\leftarrow X^1\Sigma^+(0,0)$  spectrum.

| <b>J'</b> | <b>O (J)</b> | <b>P (J)</b> | <b>Q (J)</b> | <b>R (J)</b> | <b>S (J)</b> |
|-----------|--------------|--------------|--------------|--------------|--------------|
| 0         |              |              |              |              |              |
| 1         |              |              |              |              |              |
| 2         | 74406        | 74471.7      | 74494.1      | 74530.8      | 74534.0      |
| 3         |              | 74455.2      | 74491.3      | 74539.2      | 74555.2      |
| 4         |              | 74438.0      | 74484.9      | 74547.2      | 74575.2      |
| 5         |              | 74420.8      | 74477.7      | 74555.2      | 74593.7      |
| 6         |              | 74409.6      | 74469.3      | 74562.4      | 74627.8      |
| 7         |              |              | 74452.8      | 74568.8      | 75282.1      |
| 8         |              |              |              |              |              |

**Table S1c.** Rotational line wavenumbers for the HI  $m^3\Pi_{2,1}[3/2]7s\sigma \leftarrow\leftarrow X^1\Sigma^+(2,0)$  spectrum.

| $J'$ | $O(J)$  | $P(J)$  | $Q(J)$     | $R(J)$  | $S(J)$  |
|------|---------|---------|------------|---------|---------|
|      |         |         | $m^3\Pi_2$ |         |         |
| 0    |         |         |            |         |         |
| 1    |         |         |            |         |         |
| 2    |         | 74463.3 |            | 74501.3 |         |
| 3    |         | 74446.4 |            | 74507.4 |         |
| 4    |         | 74428.4 |            | 74510.9 |         |
| 5    |         |         |            | 74514.2 |         |
| 6    |         |         |            | 74518.2 |         |
| 7    |         |         |            | 74522.2 |         |
| 8    |         |         |            | 74526.4 |         |
|      |         |         | $m^3\Pi_1$ |         |         |
| 0    |         |         |            |         |         |
| 1    | 74507.4 | 74555.2 | 74570.0    | 74604.1 |         |
| 2    |         |         |            |         | 74606.5 |

**Table S1d.** Rotational line wavenumbers for the HI  $P^1\Delta_2[1/2]4f\pi(v'=0)$  and  $k^3\Pi_2[1/2]5d\delta(v'=1)\leftarrow\leftarrow X^1\Sigma^+(v''=0)$  spectra.

| $J'$ | $O(J)$  | $P(J)$  | $Q(J)$        | $R(J)$  | $S(J)$  |
|------|---------|---------|---------------|---------|---------|
|      |         |         | $P^1\Delta_2$ |         |         |
| 0    |         |         |               |         |         |
| 1    |         |         |               |         |         |
| 2    | 75033.8 | 75086.3 | 75123.8       | 75147.6 | 75159.9 |
| 3    | 75005.8 | 75072.5 | 75121.4       | 75159.8 | 75180.8 |
| 4    |         | 75058.1 | 75119.6       | 75169.9 | 75208.4 |
| 5    |         | 75042.9 | 75117.4       | 75181.0 | 75232.6 |
| 6    |         | 75026.8 | 75114.6       | 75191.3 | 75257.6 |
| 7    |         | 75011   | 75109.4       |         | 75282.1 |
|      |         |         | $k^3\Pi_2$    |         |         |
| 0    |         |         |               |         |         |
| 1    |         |         |               |         |         |
| 2    | 75059.9 |         | 75122.4       |         | 75158.7 |
| 3    |         |         | 75123.0       |         | 75184.1 |
| 4    |         |         | 75122.1       |         |         |
| 5    |         |         | 75120.9       |         |         |
| 6    |         |         | 75119.4       |         |         |
| 7    |         |         | 75117.5       |         |         |

**Table S1e.** Rotational line wavenumbers for the HI  $j^3\Sigma_0^+[1/2]5d\pi(v'=1)$  and  $V^1\Sigma^+(v'=m+22)\leftarrow\leftarrow X^1\Sigma^+(v''=0)$  spectra.

| $J'$ | $Q(J)$          | $Q(J)$        |
|------|-----------------|---------------|
|      | $j^3\Sigma_0^+$ | $V^1\Sigma^+$ |
| 0    | 75545.5         | 75610.0       |
| 1    | 75543.1         | 75604.8       |
| 2    | 75538.3         | 75591.7       |
| 3    | 75530.2         | 75570.5       |
| 4    | 75518.6         | 75542.5       |
| 5    | 75511.4         | 75500.4       |
| 6    | 75488.5         | 75460.1       |
| 7    | 75464.1         | 75410.1       |
| 8    | 75434.0         |               |

**Table S1f.** Rotational line wavenumbers for the HI  $M^1\Pi_1[1/2]7s\sigma(v'=0)$  and  $V^1\Sigma^+(v'=m+29)\leftarrow\leftarrow X^1\Sigma^+(v''=0)$  spectra.

| $J'$ | $O(J)$  | $P(J)$  | $Q(J)$     | $R(J)$  | $S(J)$  | $Q(J)$        |
|------|---------|---------|------------|---------|---------|---------------|
|      |         |         | $M^1\Pi_1$ |         |         | $V^1\Sigma^+$ |
| 0    |         |         |            |         |         | 77226.9       |
| 1    | 77149.2 | 77183.3 | 77210.64   | 77232.3 |         | 77219.7       |
| 2    |         | 77168.4 | 77211.09   | 77241.1 | 77245.8 | 77206.2       |
| 3    |         | 77152.2 | 77207.46   | 77249.3 | 77270.6 | 77185.7       |
| 4    |         | 77134.6 | 77204.14   | 77255.1 | 77296.2 | 77160.6       |
| 5    |         |         | 77200.43   |         |         | 77129.8       |
| 6    |         |         |            |         |         | 77089.6       |
| 7    |         |         |            |         |         |               |
| 8    |         |         |            |         |         |               |



**Table S1g.** Rotational line wavenumbers for the HI  $r^3\Pi_0 [1/2]7p\sigma(v'=0)$  and  $V^1\Sigma^+(v'=m+36) \leftarrow \leftarrow X^1\Sigma^+ (v''=0)$  spectra.

| $J'$ | $Q(J)$<br>$r^3\Pi_0$ | $Q(J)$<br>$V^1\Sigma^+$ |
|------|----------------------|-------------------------|
| 0    |                      | 78655.2                 |
| 1    | 78622.8              | 78650.4                 |
| 2    | 78621.2              | 78641.2                 |
| 3    | 78617.2              | 78631.6                 |
| 4    | 78625.2              | 78604.7                 |
| 5    | 78622.8              | 78590.8                 |
| 6    | 78620.0              |                         |
| 7    | 78614.4              |                         |
| 8    | 78609.1              |                         |

**Table S2.**

a) **New HI Rydberg states:** Rydberg state specifications ( $Ry^{2S+1}A_{\Omega}[n\ell\lambda]$ ) (see main text), vibrational quantum numbers ( $v'$ ), symmetry, band origin ( $v^0$ ), rotational parameters ( $B', D'$ ), relative intensities, quantum defect values ( $\delta$ ) and line series observed in Rydberg state spectra.

| State specifications     | $v'$ | Symmetry | $v^0/\text{cm}^{-1}$ | $B'/\text{cm}^{-1}$ | $D'*10^4/\text{cm}^{-1}$ | Int. | Quantum defect $\delta$ | Line series observed |
|--------------------------|------|----------|----------------------|---------------------|--------------------------|------|-------------------------|----------------------|
| $d^3\Pi_1[3/2]6p\sigma$  | 3    | e        | 69691.6              | 6.08                | 3.7                      | vw   | 3.67                    | $O, Q, S$            |
|                          |      | f        | 69691.6              | 5.93                | 18.0                     |      |                         | $P, R$               |
| $f^3\Delta_2 [3/2]7p\pi$ | 0    | e        | 74500.9              | 5.58                | -8.4                     | w    | 3.56                    | $O, Q, S$            |
|                          |      | f        | 74509.4              | 5.69                | 35.8                     |      |                         | $P, R$               |
| $m^3\Pi_2[1/2]7s\sigma$  | 2    | f        | 74484.1              | 5.10                | -57.8                    | w    | 4.14                    | $P, R$               |
| $m^3\Pi_1[1/2]7s\sigma$  | 2    | e        | 74571.3              | 5.90                | ---                      | w    | 4.13                    | $O, Q, S$            |
|                          |      | f        | 74581.8              | 5.81                |                          |      |                         | $P, R$               |

**b) Interacting Rydberg and ion-pair states:** Rydberg and ion-pair states specifications ( $Ry^{2S+1}A_{\Omega}[\Omega_c]nl\lambda$ ) (see main text), vibrational quantum numbers ( $\nu'$ ), symmetry, band origin ( $\nu^0$ ), rotational parameters ( $B', D'$ ), relative intensities, quantum defect values ( $\delta$ ) and line series observed in Rydberg state spectra.

| State specifications      | $\nu'$ | Symm. | $\nu^0/\text{cm}^{-1}$ | $B'/\text{cm}^{-1}$ | $D'*10^4/\text{cm}^{-1}$          | Int. | Quantum defect $\delta$ | Line series observed |
|---------------------------|--------|-------|------------------------|---------------------|-----------------------------------|------|-------------------------|----------------------|
| $P^1\Delta_2 [1/2]4f\pi$  | 0      | e     | 75124.9 <sup>a</sup>   | 6.11 <sup>a</sup>   | 9.8 <sup>a</sup>                  | ms   | 1.20                    | $O, Q, S$            |
|                           |        |       | 75123.0 <sup>b</sup>   | 6.27 <sup>b</sup>   | 30.9 <sup>b</sup>                 |      |                         |                      |
|                           |        | f     | 75124.6 <sup>a</sup>   | 6.15 <sup>a</sup>   | 7.8 <sup>a</sup>                  |      |                         | $P, R$               |
| $k^3\Pi_2 [1/2]5d\delta$  | 1      | e     | 75123.0 <sup>a</sup>   | 6.26 <sup>a</sup>   | 7.9 <sup>a</sup> 7.0 <sup>b</sup> | ms   | 2.39                    | $Q, S$               |
|                           |        |       | 75124.0 <sup>b</sup>   | 6.26 <sup>b</sup>   |                                   |      |                         |                      |
| $j^3\Sigma_0^+[1/2]5d\pi$ | 1      | e     | 75546.1 <sup>a</sup>   | 5.14 <sup>a</sup>   | 54.0 <sup>a</sup>                 | vs   | 2.36                    | $Q$                  |
|                           |        |       | 75546.0 <sup>b</sup>   | 5.16 <sup>b</sup>   | 54.8 <sup>b</sup>                 |      |                         |                      |
| $V^1\Sigma^+$             | $m+22$ | e     | 75612.6 <sup>a</sup>   | 2.80 <sup>a</sup>   | 12.0 <sup>a</sup>                 | m    |                         |                      |
|                           |        |       | 75610.0 <sup>b</sup>   | 2.98 <sup>b</sup>   | 38.8 <sup>b</sup>                 |      |                         |                      |
| $M^1\Pi_1 [1/2]7s\sigma$  | 0      | e     | 77212.1 <sup>a</sup>   | 5.97 <sup>a</sup>   | -81.0 <sup>a</sup>                | vw   | 3.96                    | $O, Q, S$            |
|                           |        |       | 77214.0 <sup>b</sup>   | 5.72 <sup>b</sup>   | -50.6 <sup>b</sup>                |      |                         |                      |
|                           |        | f     | 77211.9 <sup>a</sup>   | 5.87 <sup>a</sup>   | -20.0 <sup>a</sup>                |      |                         | $P, R$               |
| $V^1\Sigma^+$             | $m+29$ | e     | 77226.8 <sup>a</sup>   | 2.98 <sup>a</sup>   | -26.0 <sup>a</sup>                | m    |                         | $Q$                  |
|                           |        |       | 77224.0 <sup>b</sup>   | 3.46 <sup>b</sup>   | 38.4 <sup>b</sup>                 |      |                         |                      |
| $r^3\Pi_0 [1/2]7p\sigma$  | 0      | e     | 78623.0 <sup>a</sup>   | 6.30 <sup>a</sup>   | 28.0 <sup>a</sup>                 | s    | 3.76                    | $Q$                  |
|                           |        |       | 78625.0 <sup>b</sup>   | 6.33 <sup>b</sup>   | 35.8 <sup>b</sup>                 |      |                         |                      |
| $V^1\Sigma^+$             | $m+36$ | e     | 78655.0 <sup>a</sup>   | 3.90 <sup>a</sup>   | -65.0 <sup>a</sup>                | ms   |                         | $Q$                  |
|                           |        |       | 78654.0 <sup>b</sup>   | 3.48 <sup>b</sup>   | -27.1 <sup>b</sup>                |      |                         |                      |

<sup>a</sup>Underperturbed(perturbed) values; this work

<sup>b</sup>Derperturbed values; this work

**Table S3.** State interactions;  $J'$  level proximity ( $\Delta E_{J'} = E_{J'}(1) - E_{J'}(2) / \text{cm}^{-1}$ ), interaction strength ( $W_{12} / \text{cm}^{-1}$ ) and fractional state mixing ( $c_1^2, c_2^2$ ).

| $P^1\Delta_2 [1/2]4f\pi(v'=0) \leftrightarrow k^3\Pi_2 [1/2]5d\delta(v'=1)$ |                 |          |         |         | $j^3\Sigma_0^+[1/2]5d\pi(v'=1) \leftrightarrow V^1\Sigma^+(v'=m+22)$ |                 |          |         |         |
|-----------------------------------------------------------------------------|-----------------|----------|---------|---------|----------------------------------------------------------------------|-----------------|----------|---------|---------|
| $J'$                                                                        | $\Delta E_{J'}$ | $W_{12}$ | $c_1^2$ | $c_2^2$ | $J'$                                                                 | $\Delta E_{J'}$ | $W_{12}$ | $c_1^2$ | $c_2^2$ |
| 2                                                                           | -1.4            | 0.7      | 0.647   | 0.353   | 0                                                                    | 64.5            | 6.4      | 0.990   | 0.010   |
| 3                                                                           | 1.6             | 0.7      | 0.753   | 0.247   | 1                                                                    | 61.7            | 6.4      | 0.989   | 0.011   |
| 4                                                                           | 2.5             | 0.7      | 0.917   | 0.083   | 2                                                                    | 53.4            | 6.4      | 0.986   | 0.014   |
| 5                                                                           | 3.5             | 0.7      | 0.960   | 0.040   | 3                                                                    | 40.3            | 6.4      | 0.974   | 0.026   |
| 6                                                                           | 4.8             | 0.7      | 0.979   | 0.021   | 4                                                                    | 23.9            | 6.4      | 0.923   | 0.077   |
| 7                                                                           | 8.1             | 0.7      | 0.993   | 0.007   | 5                                                                    | -12.8           | 6.4      | 0.438   | 0.562   |
|                                                                             |                 |          |         |         | 6                                                                    | -28.4           | 6.4      | 0.947   | 0.053   |
|                                                                             |                 |          |         |         | 7                                                                    | -54.0           | 6.4      | 0.986   | 0.014   |

  

| $M^1\Pi_1 [1/2]7s\sigma(v'=0) \leftrightarrow V^1\Sigma^+(v'=m+29)$ |                 |          |         |         | $r^3\Pi_0 [1/2]7p\sigma(v'=0) \leftrightarrow V^1\Sigma^+(v'=m+36)$ |                 |          |         |         |
|---------------------------------------------------------------------|-----------------|----------|---------|---------|---------------------------------------------------------------------|-----------------|----------|---------|---------|
| $J'$                                                                | $\Delta E_{J'}$ | $W_{12}$ | $c_1^2$ | $c_2^2$ | $J'$                                                                | $\Delta E_{J'}$ | $W_{12}$ | $c_1^2$ | $c_2^2$ |
| 1                                                                   | 9.1             | 0.6      | 0.996   | 0.004   | 1                                                                   | 27.6            | 7.2      | 0.927   | 0.073   |
| 2                                                                   | -4.9            | 1.0      | 0.959   | 0.041   | 2                                                                   | 20.0            | 7.2      | 0.848   | 0.152   |
| 3                                                                   | -21.8           | 1.4      | 0.996   | 0.004   | 3                                                                   | 14.4            | 7.2      | 0.531   | 0.469   |
| 4                                                                   | -43.5           | 1.8      | 0.998   | 0.002   | 4                                                                   | -20.5           | 7.2      | 0.857   | 0.143   |
| 5                                                                   | -70.5           | 2.2      | 0.999   | 0.001   | 5                                                                   | -40.1           | 7.2      | 0.967   | 0.033   |
|                                                                     |                 |          |         |         | 6                                                                   | -59.9           | 7.2      | 0.985   | 0.015   |

**Table S4.** Summary of Rydberg states and spectra, previously observed and reassigned<sup>a</sup>. Rydberg state specifications ( $Ry^{2S+1}A_{\Omega}[\Omega_c]nl\lambda$ ), vibrational quantum numbers ( $\nu'$ ), band origin ( $\nu^0$ ), rotational parameters ( $B'$ ,  $D'$ ), quantum defect values ( $\delta$ ) and references of previous observations.

| State specifications                                           | $\nu'$ | $\nu^0/\text{cm}^{-1}$ | $B'/\text{cm}^{-1}$ | $D'*10^4/\text{cm}^{-1}$ | Quantum defect $\delta$ | Refs.   |
|----------------------------------------------------------------|--------|------------------------|---------------------|--------------------------|-------------------------|---------|
| <b><math>[\Omega_c]ns\sigma</math> (<math>n = 6, 7</math>)</b> |        |                        |                     |                          |                         |         |
| $b^3\Pi_2[3/2]6s\sigma$                                        | 0      | 55 833.1               | 6.348               | --                       | 4.02                    | [1]     |
|                                                                | 1      | 58 040.5               | 6.173               | --                       | 4.02                    | [1]     |
| $b^3\Pi_1[3/2]6s\sigma$                                        | 0      | 56 738.3               | 6.427               | --                       | 3.99                    | [1]     |
|                                                                | 1      | 58 937±20              | --                  | --                       | 3.98                    | [1]     |
| $b^3\Pi_0^+[1/2]6s\sigma$                                      | 0      | 60 857.9               | 6.426               | --                       | 4.03                    | [1]     |
|                                                                | 1      | 63 064.0               | 6.245               | --                       | 4.03                    | [1]     |
|                                                                | 3      | 67 150.3               | 5.693               | 2.3                      | 4.02                    | [2]     |
| $C^1\Pi_1[1/2]6s\sigma$                                        | 0      | 62 325±10              | --                  | --                       | 3.97                    | [1]     |
|                                                                | 1      | 64 508±10              | --                  | --                       | 3.89                    | [1]     |
| $m^3\Pi_2[3/2]7s\sigma$                                        | 0      | 70 837.6/70 841.5      | 6.11/ 6.21 ± 0.04   | 1.94/ 12± 5              | 4.09                    | [3]/[4] |
|                                                                | 1      | 72 697.2               | 6.014               | 2.30                     | 4.12                    | [3]     |
|                                                                | 2      | 74484.1                | 5.10                | -57.8                    | 4.14                    | [11]    |
| $m^3\Pi_1[3/2]7s\sigma$                                        | 0      | 71 287.3               | 6.254               | 3.18                     | 4.04                    | [3]     |
|                                                                | 1      | 72 924.8/72 945.0      | 6.205/6.16          | 4.6/-16                  | 4.09                    | [3]/[6] |
|                                                                | 2      | 74571.3                | 5.90                | ---                      | 4.13                    | [11]    |
| $M^1\Pi_1 [1/2]7s\sigma$                                       | 0      | 77212.1                | 5.97                | -81.0                    | 3.96                    | [11]    |
| <b><math>[\Omega_c]np\sigma</math> (<math>n = 6, 7</math>)</b> |        |                        |                     |                          |                         |         |
| $d^3\Pi_2[3/2]6p\sigma$                                        | 0      | 63 854.9               | 6.065               | 1.7                      | 3.65                    | [2]     |
|                                                                | 1      | 66 009.4               | 5.926               | 1.5                      | 3.65                    | [2]     |
| $d^3\Pi_1[3/2]6p\sigma$                                        | 0      | 63 883                 | --                  | --                       |                         | [2]     |
|                                                                | 3      | 69691.6                | 6.08                | 3.7                      | 3.67                    | [11]    |
| $d^3\Pi_0^+[1/2]6p\sigma$                                      | 0      | 69 157                 | 6.117               | 2.1                      | 3.65                    | [2]     |
|                                                                | 1      | 70 988.2               | 5.79 ± 0.12         | -290 ± 40                | 3.67                    | [4]     |
| $D^1\Pi_1[1/2]6p\sigma$                                        | 0      | 69 244.5               | 6.198               | 2.1                      | 3.65                    | [2]/[3] |
|                                                                | 1      | 71 382.4               | 6.052               | 1.92                     | 3.65                    | [3]     |
|                                                                | 2      | 73 412.3               | 5.937               | 12.6                     | 3.65                    | [3]     |

|                                                                |   |                    |                       |                    |      |              |
|----------------------------------------------------------------|---|--------------------|-----------------------|--------------------|------|--------------|
| $r^3\Pi_1[3/2]7p\sigma$                                        | 0 | 74 320             | 6.040                 | -4.48              | 3.59 | [3]          |
| $r^3\Pi_0[1/2]7p\sigma$                                        | 0 | 78623.0            | 6.30                  | 28.0               | 3.76 | [11]         |
| <b><math>[\Omega_c]n\rho\pi</math> (<math>n = 6, 7</math>)</b> |   |                    |                       |                    |      |              |
| $E^1\Sigma^+[1/2]6\rho\pi$                                     | 0 | 70 850.5/70 866.3  | 6.00/ 5.94 $\pm$ 0.17 | 128/ -11 $\pm$ 21  | 3.55 | [3]/[4]/[10] |
|                                                                | 1 | 72 650.8/ 72 654.3 | 5.29/5.19             | 4.63/-16           | 3.57 | [3]/[4]/[10] |
|                                                                | 3 | 75 982.3           | 4.10                  | -30                | 3.61 | [10]         |
| $f^3\Delta_3[3/2]6\rho\pi$                                     | 0 | 64 572.6           | 5.715                 | -7.6               | 3.61 | [2]          |
| $f^3\Delta_2[3/2]6\rho\pi$                                     | 0 | 64 693.9/64 691    | 6.737/6.80 $\pm$ 0.03 | 10.6/2.9 $\pm$ 1.2 | 3.60 | [3]/[5]      |
|                                                                | 1 | 66 610             | 6.17 $\pm$ 0.01       | 15 $\pm$ 3         | 3.62 | [5]/[7]      |
| $f^3\Delta_1[1/2]6\rho\pi$                                     | 0 | 69 687.0/69 699.9  | 6.135/6.31 $\pm$ 0.02 | 1.92/4.6 $\pm$ 1.0 | 3.62 | [2]/[3]/[4]  |
|                                                                | 1 | 71 780.5           | 5.957                 | 9.73               | 3.62 | [3]          |
| $F^1\Delta_2[1/2]6\rho\pi$                                     | 0 | 70 228.3/70 223.6  | 6.30/ 6.32 $\pm$ 0.01 | 1.2/ 2.6 $\pm$ 0.6 | 3.59 | [2]/[3]/[4]  |
|                                                                | 1 | 72 324.0           | 6.13                  | 0.0003             | 3.59 | [6]          |
|                                                                | 2 | 74 272.8           | 5.93                  | 77                 | 3.59 | [11]         |
| $g^3\Sigma_{0+}^-[3/2]6\rho\pi$                                | 0 | 66 022.6           | 6.110                 | 2.5                | 3.51 | [3]          |
|                                                                | 1 | 67 704.4           | 5.62                  | 28                 | 3.54 | [3]          |
| $g^3\Sigma_{1\pm}^-[1/2]6\rho\pi$                              | 0 | 68 908.8           | 6.06                  | 1.7                | 3.67 | [3]          |
| $f^3\Delta_2[3/2]7\rho\pi$                                     | 0 | 74500.9            | 5.58                  | -8.4               | 3.56 | [11]         |
| $g^3\Sigma_{0+}^-[3/2]7\rho\pi$                                | 0 | 74 735.2           | 6.10                  | 14.8               | 3.52 | [8]/[10]     |
|                                                                | 1 | 76 364.4           | 4.36                  | -38                | 3.61 | [10]         |
| $g^3\Sigma_{1\pm}^-[1/2]7\rho\pi$                              | 0 | 79 145.1           | 5.77                  | 25.9               | 3.68 | [10]         |
| $F^1\Delta_2[1/2]7\rho\pi$                                     | 0 | 79 923.5           | 6.74                  | 10                 | 3.54 | [10]         |
| <b><math>[\Omega_c]n d\sigma</math> (<math>n = 5</math>)</b>   |   |                    |                       |                    |      |              |
| $N^1\Pi_1[1/2]5d\sigma$                                        | 0 | 71 526.2           | 6.163                 | 1.74               | 2.50 | [3]          |
|                                                                | 2 | 74 899.2           | 6.17                  | 6.2                | 2.56 | [8]          |
| <b><math>[\Omega_c]n d\pi</math> (<math>n = 5</math>)</b>      |   |                    |                       |                    |      |              |
| $H^1\Sigma^+[3/2]5d\pi$                                        | 0 | 68 277.3           | 5.78                  | 5.0                | 2.34 | [3]/[10]     |
|                                                                | 1 | 70 242.1/70 236.1  | 5.95/6.34 $\pm$ 0.01  | 125/1100 $\pm$ 20  | 2.36 | [3]/[4]/[10] |
|                                                                | 2 | 72 217.6           | 4.35                  | 24.2               | 2.36 | [3]/[10]     |
| $i^3\Delta_3[3/2]5d\pi$                                        | 0 | 68 326.2           | 6.21                  | -25                | 2.34 | [9]          |

|                                                |   |                   |                    |                 |      |             |
|------------------------------------------------|---|-------------------|--------------------|-----------------|------|-------------|
| $I^1\Delta_2[1/2]5d\pi$                        | 0 | 71 990/71 989.4   | 6.312/ 6.31 ± 0.01 | 2.7/ 2.4 ± 0.1  | 2.47 | [7]/[4]     |
|                                                | 2 | 76 080.8          | 5.82               | 9               | 2.47 | [10]        |
|                                                | 3 | 77 954.1          | 5.55               | -2.6            | 2.48 | [10]        |
| $j^3\Sigma_{0+}^-[1/2]5d\pi$                   | 0 | 73 254.9/73 252.0 | 5.71/5.63          | 47.5/46         | 2.37 | [6]         |
|                                                | 1 | 75546.1           | 5.14               | 54.0            | 2.36 | [11]        |
|                                                | 2 | 77 346.0          | 5.09               | -79             | 2.37 | [10]        |
| $H^1\Sigma^+[3/2]6d\pi$                        | 1 | 77 615.4          | 5.56               | 90              | 2.36 | [10]        |
| $i^3\Delta_2[3/2]6d\pi$                        | 0 | 75 246.1          | 6.14               | 5               | 2.42 | [10]        |
| <b><math>[\Omega_c]nd\delta (n = 5)</math></b> |   |                   |                    |                 |      |             |
| $k^3\Pi_{0+}^-[3/2]5d\delta$                   | 0 | 68 110.7          | 6.24               | 3               | 2.35 | [3]         |
|                                                | 1 | 70 320.4/70 310.8 | 5.058/5.13 ± 0.03  | -21/ -4 ± 9     | 2.35 | [3]/[4]     |
|                                                | 2 | 72 353.1/72 355.6 | 5.650/5.86         | -5.49/42        | 2.35 | [3]         |
| $k^3\Pi_1[3/2]5d\delta$                        | 0 | 68 991.8          | 6.459              | 3.3             | 2.28 | [3]         |
|                                                | 1 | 71 125.0/71 126.4 | 6.30/6.22 ± 0.02   | 4.82/-2.6 ± 1.6 | 2.27 | [3]/[4]     |
|                                                | 2 | 73 180.7/73 176.7 | 6.034/6.13         | 8.72/23         | 2.27 | [3]         |
| $k^3\Pi_2[1/2]5d\delta$                        | 0 | 73 360.9          | 6.403              | 6.123           | 2.36 | [3]         |
|                                                | 1 | 75123.0           | 6.26               | 7.9             | 2.39 | [11]        |
| $K^1\Pi_1[1/2]5d\delta$                        | 0 | 74 282.1          | 6.255              | 6.09            | 2.28 | [3]         |
| <b><math>[\Omega_c]nf\pi (n = 4,5)</math></b>  |   |                   |                    |                 |      |             |
| $O^1\Sigma^+[3/2]4f\pi$                        | 0 | 71 301.9/71 294.7 | 5.82/ 6.25 ± 0.22  | --/ 33± 26      | 1.04 | [7]/[4]     |
|                                                | 1 | 73 383.6/73 384.2 | 5.819/5.70         | 4.46/0          | 1.04 | [3]/[7]/[6] |
|                                                | 2 | 75 410.1          | 5.19               | 38              | 1.04 | [10]        |
|                                                | 3 | 77 448.2          | 4.56               | -51             | 1.03 | [10]        |
| $p^3\Delta_2[3/2]4f\pi$                        | 0 | 73 081.7          | 6.35               | 2.0             | 0.8  | [6]/ [11]   |
| $P^1\Delta_2[1/2]4f\pi$                        | 0 | 75 124.6          | 6.15               | 8               | 1.20 | [10]        |
|                                                | 2 | 78 502.6          | 5.67               | -52             | 1.27 | [10]        |
| $q^3\Sigma_{0+}^-[1/2]4f\pi$                   | 0 | 76 234.4          | 5.50               | 160             | 1.08 | [10]        |

New states.

**Table S5.** Summary of ion-pair states and spectra, previously observed. State specifications, vibrational quantum numbers ( $v' = m + i$ ;  $m$  unknown integer), band origin ( $v^0$ ), rotational parameters ( $B'$ ,  $D'$ ) and references.

| State specification                     | $v'^a$   | $v^0/\text{cm}^{-1}$ | $B'/\text{cm}^{-1}$    | $D'*10^4/\text{cm}^{-1}$ | Refs.       |
|-----------------------------------------|----------|----------------------|------------------------|--------------------------|-------------|
| $V^1\Sigma^+_{0+}(\sigma\pi^f)\sigma^*$ | $m$      | 68 004.4             | 2.84                   | 2.0                      | [2]/[3]     |
|                                         | $m+1$    | 68 489.4             | 3.3                    | --                       | [2]/[3]     |
|                                         | $m+2$    | 68 927.3             | 3.19                   | -1.1                     | [2]/[3]     |
|                                         | $m+3$    | 69 418.5             | 3.25                   | --                       | [2]/[3]     |
|                                         | $m+4$    | 69 909.9/69 903.3    | 3.273/ 2.94 $\pm$ 0.18 | 6.54/ 10 $\pm$ 40        | [2]/[3]/[4] |
|                                         | $m+5$    | 70 512.1/70 511.0    | 3.800/ 3.66 $\pm$ 0.02 | -70.2/ 83 $\pm$ 4        | [3]/[4]     |
|                                         | $m+6$    | 70 948.6/70 952.3    | 4.09/3.56 $\pm$ 0.10   | 44/ 24 $\pm$ 10          | [3]/[4]     |
|                                         | $m+7$    | 71 478.4             | 2.95 $\pm$ 0.10        | -4 $\pm$ 5               | [4]         |
|                                         | $m+8$    | 71 920.3/71 924.4    | 3.97/4.17 $\pm$ 0.17   | 158/ 270 $\pm$ 70        | [3]/[4]     |
|                                         | $m+9$    | 72 022.4/72 023.2    | 2.792/2.84 $\pm$ 0.03  | -4.61/ 1 $\pm$ 4         | [3]/[4]     |
|                                         | $m+10$   | 72 506.0/72 508.8    | 4.106/4.25             | 14.7/80                  | [3]/[6]     |
|                                         | $m+11$   | 72 923.0             | 3.43                   | 19                       | [6]         |
|                                         | $m+12$   | 73 110.8             | 4.34                   | 10                       | [6]         |
|                                         | $m+13$   | 73 457.8/73 459.1    | 3.177/4.52             | -23.7/89                 | [3]/[6]     |
|                                         | $m+14$   | 73 589.5/73 590.8    | 2.294/2.23             | -11.5/0.0                | [3]/[6]     |
|                                         | $m+15$   | 73 822.7/73 831.8    | 3.679/4.14             | -2.25/90                 | [3]/[6]     |
|                                         | $m+16$   | 74 090.0/74 091.0    | 3.724/3.71             | 5.8/22.6                 | [3]/[8]     |
|                                         | $m+17$   | 74 372.0             | 3.9                    | 4.2                      | [8]         |
|                                         | $m+18$   | 74 615.4             | 3.76                   | 3.67                     | [8]         |
| $m+19$                                  | 74 924.0 | 3.05                 | 3.83                   | [8]                      |             |
|                                         | $m + 20$ | 75 025.4             | 3.02                   | -33                      | [10]        |
|                                         | $m + 21$ | 75 189.5             | 2.41                   | 1423                     | [10]        |
|                                         | $m + 22$ | 75612.6              | 2.80                   | 12.0                     | [11]        |
|                                         | $m + 23$ | 75 822.0             | 2.79                   | 63                       | [10]        |
|                                         | $m + 24$ | 75 919.1             | 3.16                   | -27                      | [10]        |
|                                         | $m + 26$ | 76 479.9             | 2.67                   | -31                      | [10]        |
|                                         | $m + 29$ | 77 226.8             | 3.13                   | 14                       | [10]        |
|                                         | $m + 31$ | 77 795.6             | 3.01                   | 28                       | [10]        |

|  |          |          |      |       |      |
|--|----------|----------|------|-------|------|
|  | $m + 32$ | 77 934.8 | 2.80 | 11    | [10] |
|  | $m + 35$ | 78 585.1 | 2.61 | -54   | [10] |
|  | $m + 36$ | 78655.0  | 3.90 | -65.0 | [11] |

a. Vibrational quantum numbers are marked as  $v' = m + i$  for positive integer numbers of  $i$  ranging from zero for the lowest vibrational level observed and  $m$  as an unknown positive integer.

New states.

## References:

- [1] S.G. Tilford, M.L. Ginter, A.M. Bass, *J. Mol. Spectrosc.* 34 (1970) 327.
- [2] M.L. Ginter, S.G. Tilford, A.M. Bass, *J. Mol. Spectrosc.* 57 (1975) 271.
- [3] D.S. Ginter, M.L. Ginter, S.G. Tilford, *J. Mol. Spectrosc.* 92 (1982) 40.
- [4] H. R. Hróðmarsson, H. Wang, and Á. Kvaran, *J. Mol. Spectrosc.* 5 (2013) 290.
- [5] S.A. Wright, J.D. McDonald, *J.Chem.Phys.* 101 (1994) 238-245.
- [6] H. R. Hróðmarsson, H. Wang, and Á. Kvaran, *J. Chem. Phys.* 142 (2015) 244312.
- [7] S.T. Pratt, M.L. Ginter, *J. Chem. Phys.* 102 (1995) 1882-1888.
- [8] A. Hafliðason, M-X Jiang and Á. Kvaran, *Phys. Chem. Chem. Phys.* 21 (2019) 23154.
- [9] P. M. Regan, D. Ascenzi, E. Wrede, P. A. Cook, M. N. R. Ashfold and A. J. Orr-Ewing, *Phys. Chem. Chem. Phys.* 2 (2000) 23.
- [10] M-X. Jiang, A. Hafliðason and Á. Kvaran, *J. Mol. Spectrosc.* 372 (2020) 111329.
- [11] This work
